# Supplementary material
Source: MDPI journal article supplement (https://www.mdpi.com/2571-9408/4/4/231)
Supplement: s1 [file s1 › heritage-1376486-supplementary.pdf]

## **SUPPLEMENTARY INFORMATION**

### ***Jazz* Colors: Pigment Identification in the Gouaches Used by Henri Matisse.**

### **Spectra and summary of the analyses carried out on the *Jazz* colors using transmitted and reflectance infrared, Raman, SERS, and X-ray fluorescence spectroscopies**

Ana Martins <sup>1,\*</sup>, Anne Catherine Prud'hom <sup>2</sup>, Maroussia Duranton <sup>3</sup>, Abed Haddad <sup>1,4,5</sup>, Celine Daher <sup>6</sup>, Anne Genachte-Le Bail <sup>3</sup>, Tiffany Tang <sup>1</sup>

<sup>1</sup> The David Booth Conservation Department, The Museum of Modern Art, 11W53rd Street, New York, 10019 NY, USA, abed\_haddad@moma.org; tiffany.h.tang@gmail.com

<sup>2</sup> Service de la Restauration, Cabinet d'Art Graphique, Musée National d'Art Moderne, Centre Pompidou, 75191 Cedex 04, Paris, France, Anne-catherine.PrudHom@centrepompidou.fr

<sup>3</sup> Institut National du Patrimoine, Département des Restaurateurs, Laboratoire de Recherche, 124 rue Henri Barbusse, 93300 Aubervilliers, France, maroussia.duranton@culture.gouv.fr; anne.genachte-le-bail@culture.gouv.fr

<sup>4</sup> Ph. D Program in Chemistry, City University of New York Graduate School and University Center, 365 5th Avenue, New York, NY, 10016 USA.

<sup>5</sup> Department of Chemistry, City University of New York, City College of New York, 160 Convent Avenue, New York, NY 10031 USA.

<sup>6</sup> Centre de Recherche sur la Conservation (CRC, USR 3224), Musée National d'Histoire Naturelle, Ministère de la Culture, CNRS; CP21, 36 rue Geoffroy-Saint-Hilaire, 75005 Paris, France, celine.daher@mnhn.fr

\* Correspondence: [a.martins@vangoghmuseum.nl](mailto:a.martins@vangoghmuseum.nl)

### **Supporting Information Table of Contents**

- Table S1: All pigments and auxiliary compounds detected and identified across three copies of *Jazz* using a multi-analytical approach
- Table S2: Gouaches identified in each *Jazz* plate.
- Figure S1: p-XRF spectra for the Black 1 (Bk1) and Black 2 (Bk2).
- Figure S2: r- and  $\mu$ -FTIR spectra of Black 1 (Bk1) and Black 2 (Bk2).
- Figure S3: Confocal and p-Raman spectra of Black 1 (Bk1) and Black 2 (Bk2).
- Figure S4: SERS spectra of Violet (V).
- Figure S5: p-XRF spectra for the Violet (V).
- Figure S6: Normal (confocal) Raman and SERS spectra of Magenta (M).
- Figure S7: p-XRF spectra for the Magenta (M).
- Figure S8: p-XRF spectra for the Pink 1 (Pk1) and Pink 2 (Pk2).
- Figure S9: Confocal Raman spectrum of Pink 2 (Pk2).
- Figure S10: p-XRF spectra for the Blue 1 (B1), Blue 2 (B2) and Blue 3 (B3).
- Figure S11: r- and  $\mu$ -FTIR spectra of Blue 2 (B2).
- Figure S12: Confocal and p-Raman spectra of Blue 2 (B2).
- Figure S13: Confocal and p-Raman spectra of Green 2 (G2).
- Figure S14: p-XRF spectra for the Green 1 (G1) and Green 3 (G3).
- Figure S15: r- and  $\mu$ -FTIR spectra of Green 2 (G2).
- Figure S16: r- and  $\mu$ -FTIR spectra of Yellow 5 (Y5).
- Figure S17: r- FTIR spectrum of Yellow 3 (Y3).
- Figure S18: Confocal and p-Raman spectra of Yellow 4 (Y4).

- Figure S19: Confocal and p-Raman spectra of Yellow 1 (Y1) and Yellow 2 (Y2).
- Figure S20: p-XRF spectra for the Yellow 1 (Y1), Yellow 4 (Y4) and Yellow 5 (Y5).
- Figure S21: Confocal Raman spectrum of Yellow 5 (Y5).
- Figure S22: p-XRF spectra for the Orange 4 (O4) and Orange 5 (O5).
- Figure S23: (a) Confocal Raman spectrum of Orange 5 (O5); confocal Raman spectrum of Orange 6 (O6); confocal and p-Raman spectrum of Gray 2 (Gy2).
- Figure S24: r- and  $\mu$ -FTIR spectra of Orange 6 (O6).
- Figure S25: r- and  $\mu$ -FTIR spectra of Orange 6 (O6).
- Figure S26: Confocal Raman spectrum of Orange 6 (O6).
- Figure S27: r- and  $\mu$ -FTIR spectra of Red 4 (R4).
- Figure S28: Confocal Raman spectrum of Red 1 (R1).
- Figure S29: p-XRF spectra for the Red 1 (R1) and Red 2 (R2).
- Figure S30: p-XRF spectra for White 1 (W1) and White 2 (W2)
- Figure S31: p-XRF spectra for the Gray 1 (Gy1), Gray 2 (Gy2) and Gray 3 (Gy3)
- Synthetic procedure for obtaining silver nanoparticles (AgNP) via the Lee-Meisel method, in addition to acid-pretreatment considerations for SERS analysis.

**Table S1:** All pigments and auxiliary compounds detected and identified across three copies of *Jazz* using a multi-analytical approach

| Color         |                                                                                     | Prints (P)                                                 | Pigment(s) identified                                                                         | MFT | p-XRF                                                      | r-FTIR | p-Raman | μ-FTIR      | Confocal Raman | SERS   | Plates sampled    |
|---------------|-------------------------------------------------------------------------------------|------------------------------------------------------------|-----------------------------------------------------------------------------------------------|-----|------------------------------------------------------------|--------|---------|-------------|----------------|--------|-------------------|
| Black 1 (Bk1) | 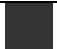   | 1, 2, 4, 5, 7, 10, 11, 13, 14, 15, 17, 18, 19, 20          | Bone black/carbon black<br>Prussian blue<br>Silicates and metal oxides                        | >3  | P, Ca<br>K, Fe<br>Si<br>(Al, K, S, Ca, Ti, Cr, Mn, Fe, Zn) | X<br>X | T       | X<br>P      | T<br>P         | *      | P1                |
| Black 2 (Bk2) | 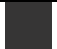   | 8, 12, 16                                                  | Bone black/carbon black<br>Prussian blue<br>Silicates and metal oxides                        | >3  | P, Ca<br>K, Fe<br>Si<br>(Al, K, S, Ca, Ti, Cr, Mn, Fe, Zn) | X<br>X | T       | X<br>X<br>X | T              | *      | P8                |
| Violet (V)    | 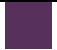   | 20                                                         | Crystal violet/methyl violet<br>Rhodamine 6G<br>Copper ferrocyanide<br>Barium sulfate         | 3   | Cu, Fe<br>S, Sr, Ba<br>Al, P (Si, K)                       | X      |         | X<br>X      | X              | X<br>X | P20               |
| Magenta (M)   | 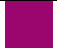   | 5, 6, 10, 11, 13, 15, 16, 17, 18                           | Rhodamine 6G<br>Rhodamine 3B<br>Copper ferrocyanide<br>Phototungstic (acid)<br>Barium sulfate | 2.5 | Cu, Fe<br>P, W<br>S, Sr, Ba<br>Al, Ca                      | X<br>X | X       |             | X              | X      | P5<br>P11         |
| Pink 1 (Pk1)  | 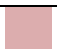 | 7, 10, 16                                                  | Crystal violet/methyl violet<br>Rhodamine 6G<br>Copper ferrocyanide<br>Barium sulfate         | 2.5 | Cu, Fe<br>S, Sr, Ba<br>Al                                  |        |         |             |                | X<br>X | P7,<br>P10<br>P16 |
| Pink 2 (Pk2)  | 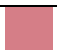 | 20                                                         | PR49:2                                                                                        | 2   | S, Ca<br>Al                                                |        | X       |             | X              | X      | P20               |
| Blue 1 (B1)   | 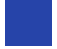 | 1, 2, 3, 4, 5, 6, 8, 9, 10, 11, 13, 14, 15, 16, 17, 18, 20 | Synthetic ultramarine                                                                         | 2   | Al, Si, S (K, Ca)                                          | X      | X       | X           | X              | *      | P1                |
| Blue 2 (B2)   | 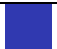 | 19                                                         | Synthetic ultramarine<br>Titanium white<br>Calcium carbonate<br>Zinc white                    | 3   | Al, Si, S (K, Ca)<br>Ti<br>Ca<br>Zn                        | X<br>X | X<br>X  | X<br>X      | X<br>X         | *      | P19               |
| Blue 3 (B3)   | 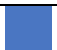 | 6                                                          | Synthetic ultramarine<br>Zinc white /<br>Barium sulfate /lithopone                            | 3   | Al, Si, S (K, Ca)<br>Zn<br>S, Ba                           | X      | X       | X           | X              | *      | P6                |
| Blue 4 (B4)   | 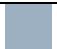 | 12                                                         | Synthetic ultramarine                                                                         | 2   | Al, Si, S (K, Ca)                                          | X      | *       | X           | X              | *      | P12               |
| Blue 5 (B5)   | 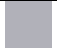 | 15                                                         | Synthetic ultramarine                                                                         | 2   | Al, Si, S (K, Ca)                                          | X      | *       | X           | X              | *      | P15               |
| Green 1 (G1)  | 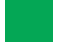 | 14, 16, 20                                                 | PG7<br>PY3<br>Barium sulfate<br>Aluminum Hydrate                                              | 2   | Cl, Cu<br>Cl<br>S, Ba<br>Al                                | X<br>X | X       | X<br>X<br>X | X              | *      | P14,<br>P20       |

| Color         |                                                                                     | Prints (P)        | Pigment(s) identified                                                                         | MFT | p-XRF                                    | r-FTIR      | p-Raman     | μ-FTIR           | Confocal Raman   | SERS | Plates sampled |
|---------------|-------------------------------------------------------------------------------------|-------------------|-----------------------------------------------------------------------------------------------|-----|------------------------------------------|-------------|-------------|------------------|------------------|------|----------------|
| Green 2 (G2)  | 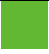   | 5, 12, 17, 18, 19 | PG7<br>PY3<br>Barium sulfate                                                                  | >3  | Cl, Cu<br>Cl<br>S, Ba                    | X<br>X<br>X | X<br>X      | X<br>X           | X                | *    | P5<br>P19      |
| Green 3 (G3)  | 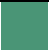   | 6, 7, 11, 18      | PG7<br>Synthetic ultramarine<br>Barium sulfate                                                | 2.5 | Cl, Cu<br>Al, Si, S, K<br>S, Ba          | X<br>X      | X           | X<br>X           | X<br>X           | *    | P6<br>P18      |
| Yellow 1 (Y1) | 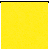   | 10, 14            | PY5                                                                                           | >3  | Al, S                                    | X           | X           | X                | X                | *    | P14            |
| Yellow 2 (Y2) | 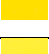   | 4                 | PY5<br>PY10                                                                                   | >3  | Cl                                       | X<br>X      | *           | X<br>X           | X<br>X           | *    | P4             |
| Yellow 3 (Y3) | 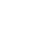   | 12, 16            | PY5<br>PY6<br>Barium sulfate/zinc white/Lithopone                                             | 3   | Cl<br>S, Zn, Ba                          | X           | *           | X<br>X           | X<br>X           | *    | P12            |
| Yellow 4 (Y4) | 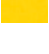   | 1, 2, 5           | PY3<br>PY6<br>Barium sulfate                                                                  | 3   | Cl<br>Cl<br>S, Sr, Ba                    | X<br>X      | X<br>X<br>X | X<br>X<br>X      | X<br>X<br>X      | *    | P1             |
| Yellow 5 (Y5) | 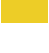   | 11                | PY3<br>PY10<br>Lead chromate<br>Calcium sulfate                                               | >3  | Cl<br>Cl<br>Cr, Pb<br>S, Ca              | X<br>X<br>X | X<br>X<br>X | X<br>X<br>X      | X<br>X<br>X      | *    | P11            |
| Yellow 6 (Y6) | 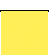 | 1, 2, 20          | PY3<br>Gypsum<br>Barium sulfate                                                               | >3  | Cl<br>S, Ca, Sr<br>S, Ba, Sr             | X<br>X      | X<br>X      | X<br>X           | X<br>X           | *    | P1,<br>P20     |
| Yellow 7 (Y7) | 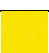 | 3, 8, 11          | PY5<br>PY3<br>Barium sulfate                                                                  | >3  | Cl<br>S, Sr, Ba                          | X<br>X<br>X | X<br>X<br>X | X<br>X<br>X      | X<br>X<br>X      | *    | P8             |
| Orange 1 (O1) | 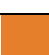 | 6, 11             | PY5<br>PR4                                                                                    | 2.5 | Al,S                                     | X<br>X      | X<br>X      | X<br>X           | X<br>X           | *    | P6             |
| Orange 2 (O2) | 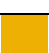 | 3                 | PY5<br>PY10<br>Lead chromate<br>Calcium sulfate                                               | 3   | Cl<br>Cr, Pb<br>S, Ca                    | X<br>X      | X<br>X<br>X | X<br>X           | X<br>X           | *    | P3             |
| Orange 3 (O3) | 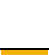 | 10                | PY5<br>PY10                                                                                   | 3   | Cl                                       | X<br>X      | *           | X<br>X           | X<br>X           | *    | P10            |
| Orange 4 (O4) | 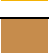 | 2                 | Iron oxide (yellow ochre)<br>Lithopone<br>Calcium carbonate                                   | >3  | Al, Si, K, Fe<br>S, Zn, Ba<br>Ca<br>P    | X           | *           | X                | X<br>X           | *    | P2             |
| Orange 5 (O5) | 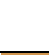 | 20                | Iron oxide (yellow ochre)                                                                     | 2.5 | Al, Si, K, Mn, Fe,<br>Ti                 | X           |             | X                | X                | *    | P20            |
| Orange 6 (O6) | 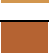 | 20                | PR4<br>PY5<br>Iron oxide (Mars red)<br>Iron oxide (ochre)<br>Calcium sulfate<br>Lead chromate | 2   | Al, Si, K, Mn, Fe<br><br>S, Ca<br>Cr, Pb | X<br><br>X  | <br>*       | X<br>X<br>X<br>X | X<br>X<br>X<br>X | *    | P20            |

| Color                                                                                                                                                                                      |                                                                                     | Prints (P)    | Pigment(s) identified                                                                                                        | MFT | p-XRF                                    | r-FTIR           | p-Raman          | μ-FTIR      | Confocal Raman | SERS | Plates sampled |
|--------------------------------------------------------------------------------------------------------------------------------------------------------------------------------------------|-------------------------------------------------------------------------------------|---------------|------------------------------------------------------------------------------------------------------------------------------|-----|------------------------------------------|------------------|------------------|-------------|----------------|------|----------------|
| Red 1 (R1)                                                                                                                                                                                 | 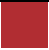   | 1, 2, 20      | PR3<br>PR49:2<br>Vermilion<br>Barium sulfate                                                                                 | 2.5 | S, Ca<br>S, Hg<br>S, Ba<br>Al            | X<br>X           | X<br>X<br>X      | X<br>X<br>X | X<br>X<br>X    | *    | P2             |
| Red 2 (R2)                                                                                                                                                                                 | 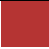   | 4, 10, 12     | PR3<br>PR49:2<br>Lead chromate<br>Barium sulfate                                                                             | >3  | S, Ca<br>Cr, Pb<br>S, Ba<br>Al           | X<br>X           | *                | *           | *              | *    |                |
| Red 3 (R3)                                                                                                                                                                                 | 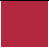   | 7, 11, 17, 19 | PR49:2                                                                                                                       | >3  | S, Ca<br>Al                              | X                | X                | X           | X              | *    | P7             |
| Red 4 (R4)                                                                                                                                                                                 | 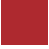   | 6, 8, 13      | PR3<br>PR49:2                                                                                                                | 3   | S, Ca<br>Al                              | X<br>X           | X<br>X           | X<br>X      | X<br>X         | *    | P6             |
| Brown (Br)                                                                                                                                                                                 | 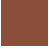   | 2, 20         | Iron oxide (Sienna/Mars Red)<br>Lead chromate<br>Calcium sulfate                                                             | >3  | Al, Si, K, Mn, Fe<br>Cr, Pb<br>S, Ca     | X<br>X<br>X      | X<br>X           | T<br>X      | X<br>X         | *    | P2,<br>P20     |
| Tan 1 (T1)                                                                                                                                                                                 | 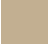   | 10            | Possibly iron oxide<br>Barium sulfate/zinc<br>white/Lithopone                                                                | 2.5 | Al, Si, Fe<br>S, Zn, Ba                  |                  |                  |             |                | *    | P10            |
| Tan 2 (T2)                                                                                                                                                                                 | 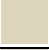 | 11            | Iron oxide                                                                                                                   | *   | Al, Si, Fe                               |                  | *                |             |                | *    |                |
| White 1 (W1)                                                                                                                                                                               | 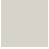 | 12            | Barium sulfate/zinc<br>white/Lithopone                                                                                       | ≈3  | S, Zn, Ba                                | X                | X                | X           | X              | *    | P12            |
| White 2 (W2)                                                                                                                                                                               | 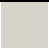 | 17            | Zinc white<br>Barium sulfate /Lithopone                                                                                      |     | Zn<br>S, Ba                              | X                | X                | X           | X              | *    | P17            |
| Gray 1 (Gy1)                                                                                                                                                                               | 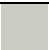 | 18            | Zinc white<br>Barium sulfate/zinc<br>white/Lithopone Prussian blue                                                           | 2.5 | Zn<br>S, Sr, Ba<br>Fe                    | X<br>X           | X<br>X           | X<br>X      | X<br>X         | *    | P18            |
| Gray 2 (Gy2)                                                                                                                                                                               | 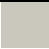 | 7,15, 17, 19  | Titanium white (anatase)<br>Calcium carbonate<br>Ultramarine blue<br>Prussian blue<br>Barium sulfate/zinc<br>white/Lithopone | 2.5 | Ti<br>Ca<br>Al, Si, S<br>Fe<br>S, Zn, Ba | X<br>X<br>X<br>X | X<br>X<br>X<br>X | X<br>X<br>X | X<br>X<br>X    | *    | P7,<br>P19     |
| Gray 3 (Gy3)                                                                                                                                                                               | 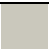 | 9             | Titanium white (anatase)<br>Calcium carbonate<br>Ultramarine blue<br>Prussian blue                                           | *   | Ti<br>Ca<br>Al, Si, S<br>Fe              | X<br>X           | *                | X           | *              | *    | P9             |
| Paper                                                                                                                                                                                      | 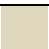 | all           | Low mineral content                                                                                                          | 2   | Al, Si, P, S, K, Ca,<br>Fe, Zn           |                  |                  |             |                | *    |                |
| (X) present, (T) tentatively identified - Raman cannot distinguish bone black from carbon black, and differentiation of iron oxide pigments with FTIR is very challenging (*) not analyzed |                                                                                     |               |                                                                                                                              |     |                                          |                  |                  |             |                |      |                |

**Table S2:** Gouaches identified in each *Jazz* plate.

|     | Bx1 | Bk2 | V | M | Pk1 | Pk2 | B1 | B2 | B3 | B4 | B5 | G1 | G2 | G3 | Y1 | Y2 | Y3 | Y4 | Y5 | Y6 | Y7 | O1 | O2 | O3 | O4 | O5 | O6 | R1 | R2 | R3 | R4 | Br | T1 | T2 | W1 | W2 | Gy1 | Gy2 | Gy3 |   |   |  |
|-----|-----|-----|---|---|-----|-----|----|----|----|----|----|----|----|----|----|----|----|----|----|----|----|----|----|----|----|----|----|----|----|----|----|----|----|----|----|----|-----|-----|-----|---|---|--|
|     |     |     |   |   |     |     |    |    |    |    |    |    |    |    |    |    |    |    |    |    |    |    |    |    |    |    |    |    |    |    |    |    |    |    |    |    |     |     |     |   |   |  |
| P1  | X   |     |   |   |     |     | X  |    |    |    |    |    |    |    |    |    |    | X  |    | X  |    |    |    |    |    |    |    | X  |    |    |    |    |    |    |    |    |     |     |     |   |   |  |
| P2  | X   |     |   |   |     |     | X  |    |    |    |    |    |    |    |    |    |    | X  |    | X  |    |    |    |    | X  |    |    | X  |    |    |    | X  |    |    |    |    |     |     |     |   |   |  |
| P3  |     |     |   |   |     |     | X  |    |    |    |    |    |    |    |    |    |    |    |    |    | X  |    | X  |    |    |    |    |    |    |    |    |    |    |    |    |    |     |     |     |   |   |  |
| P4  | X   |     |   |   |     |     | X  |    |    |    |    |    |    |    |    | X  |    |    |    |    |    |    |    |    |    |    |    |    | X  |    |    |    |    |    |    |    |     |     |     |   |   |  |
| P5  | X   |     |   | X |     |     | X  |    |    |    |    |    | X  |    |    |    |    | X  |    |    |    |    |    |    |    |    |    |    |    |    |    |    |    |    |    |    |     |     |     |   |   |  |
| P6  |     |     |   | X |     |     | X  |    | X  |    |    |    |    | X  |    |    |    |    |    |    |    | X  |    |    |    |    |    |    |    |    |    | X  |    |    |    |    |     |     |     |   |   |  |
| P7  | X   |     |   |   | X   |     |    |    |    |    |    |    |    | X  |    |    |    |    |    |    |    |    |    |    |    |    |    |    |    |    | X  |    |    |    |    |    |     |     |     | X |   |  |
| P8  |     | X   |   |   |     |     | X  |    |    |    |    |    |    |    |    |    |    |    |    |    | X  |    |    |    |    |    |    |    |    |    |    | X  |    |    |    |    |     |     |     |   |   |  |
| P9  |     |     |   |   |     |     | X  |    |    |    |    |    |    |    |    |    |    |    |    |    |    |    |    |    |    |    |    |    |    |    |    |    |    |    |    |    |     |     |     |   | X |  |
| P10 | X   |     |   | X | X   |     | X  |    |    |    |    |    |    |    | X  |    |    |    |    |    |    |    |    | X  |    |    |    |    | X  |    |    |    |    |    | X  |    |     |     |     |   |   |  |
| P11 | X   |     |   | X |     |     | X  |    |    |    |    |    |    | X  |    |    |    |    | X  |    | X  | X  |    |    |    |    |    |    |    |    | X  |    |    |    |    | X  |     |     |     |   |   |  |
| P12 |     | X   |   |   |     |     |    |    |    | X  |    |    | X  |    |    |    | X  |    |    |    |    |    |    |    |    |    |    |    | X  |    |    |    |    |    |    |    | X   |     |     |   |   |  |
| P13 | X   |     |   | X |     |     | X  |    |    |    |    |    |    |    |    |    |    |    |    |    |    |    |    |    |    |    |    |    |    |    |    | X  |    |    |    |    |     |     |     |   |   |  |
| P14 | X   |     |   |   |     |     | X  |    |    |    |    | X  |    |    | X  |    |    |    |    |    |    |    |    |    |    |    |    |    |    |    |    |    |    |    |    |    |     |     |     |   |   |  |
| P15 | X   |     |   | X |     |     | X  |    |    |    | X  |    |    |    |    |    |    |    |    |    |    |    |    |    |    |    |    |    |    |    |    |    |    |    |    |    |     |     |     | X |   |  |
| P16 |     | X   |   | X | X   |     | X  |    |    |    |    | X  |    |    |    |    | X  |    |    |    |    |    |    |    |    |    |    |    |    |    |    |    |    |    |    |    |     |     |     |   |   |  |
| P17 | X   |     |   | X |     |     | X  |    |    |    |    |    | X  |    |    |    |    |    |    |    |    |    |    |    |    |    |    |    |    |    | X  |    |    |    |    |    | X   |     | X   |   |   |  |
| P18 | X   |     |   | X |     |     | X  |    |    |    |    |    | X  | X  |    |    |    |    |    |    |    |    |    |    |    |    |    |    |    |    |    |    |    |    |    |    |     |     | X   |   |   |  |
| P19 | X   |     |   |   |     |     |    | X  |    |    |    |    | X  |    |    |    |    |    |    |    |    |    |    |    |    |    |    |    |    | X  |    |    |    |    |    |    |     |     |     | X |   |  |
| P20 | X   |     | X |   |     | X   | X  |    |    |    |    | X  |    |    |    |    |    |    |    | X  |    |    |    |    |    |    | X  | X  | X  |    |    |    | X  |    |    |    |     |     |     |   |   |  |

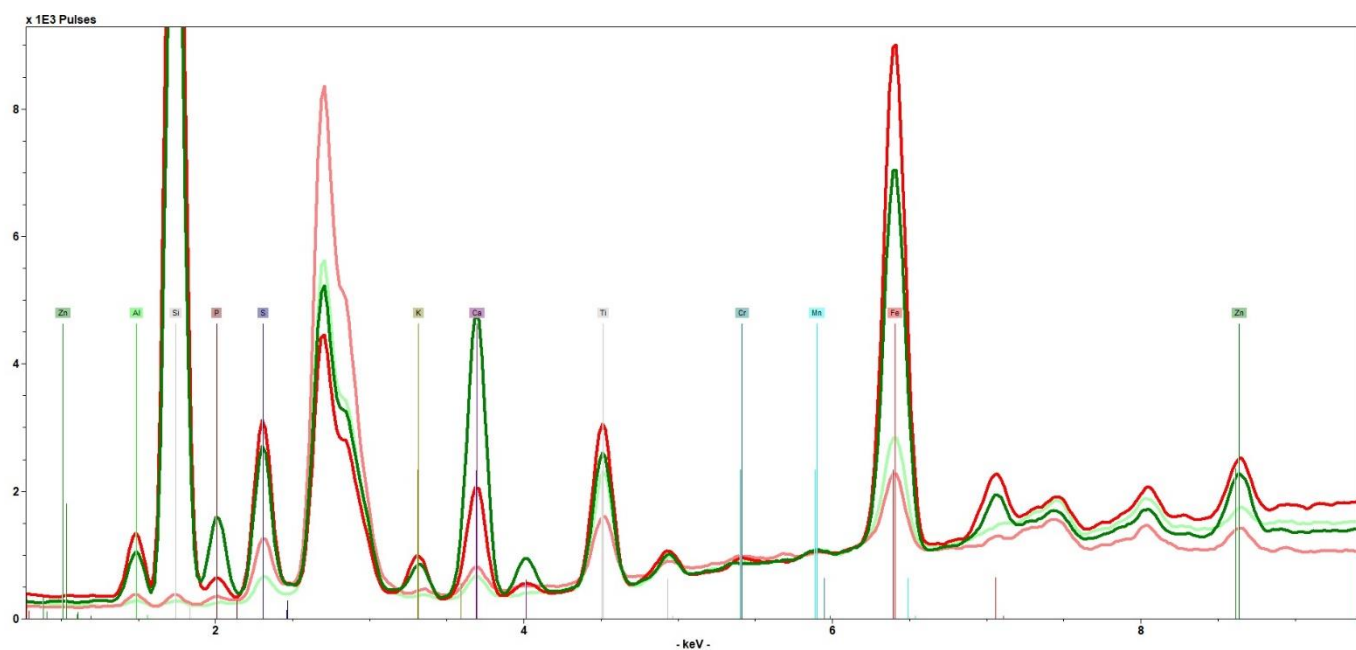

**Figure S1:** p-XRF spectra for the black gouaches (red and light red): Bk1 and paper support (plate P1) and (green and light green): Bk2 and paper support (plate P8). Elements present in both gouaches: Al, Si, P, S, K, Ca, Ti, Cr, Mn, Fe and Zn.

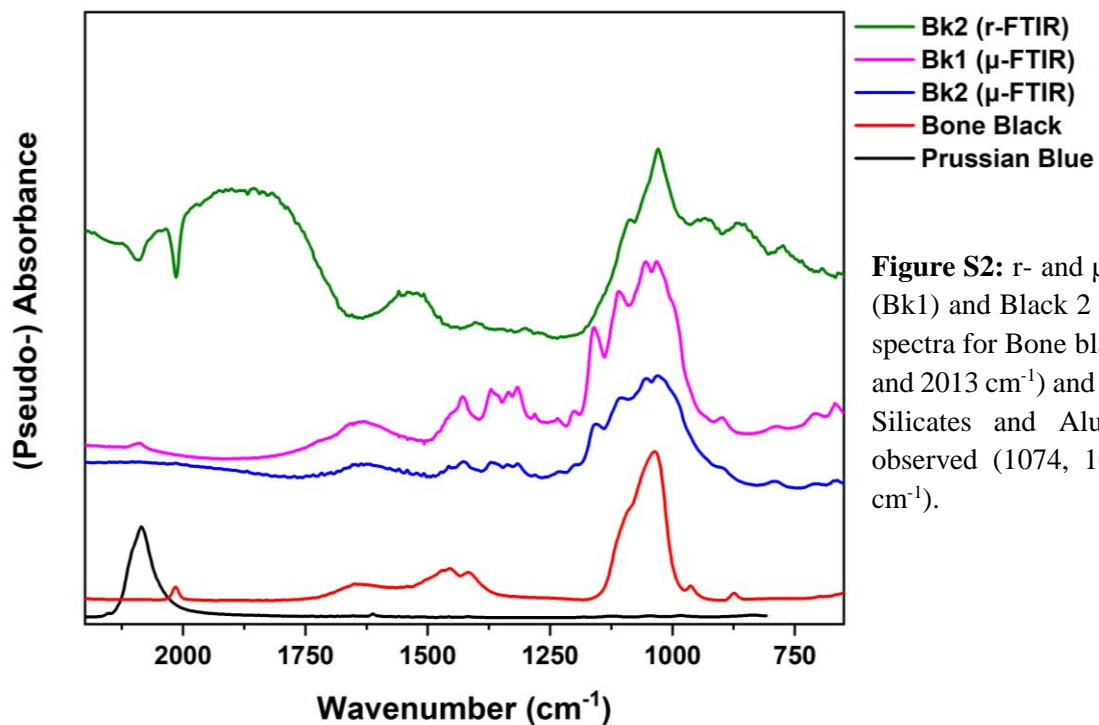

**Figure S2:** r- and  $\mu$ -FTIR spectra of Black 1 (Bk1) and Black 2 (Bk2) alongside reference spectra for Bone black (875, 962, 1038, 1087 and 2013  $\text{cm}^{-1}$ ) and Prussian blue (2094  $\text{cm}^{-1}$ ). Silicates and Aluminosilicates were also observed (1074, 1031, 1001, 794 and 470  $\text{cm}^{-1}$ ).

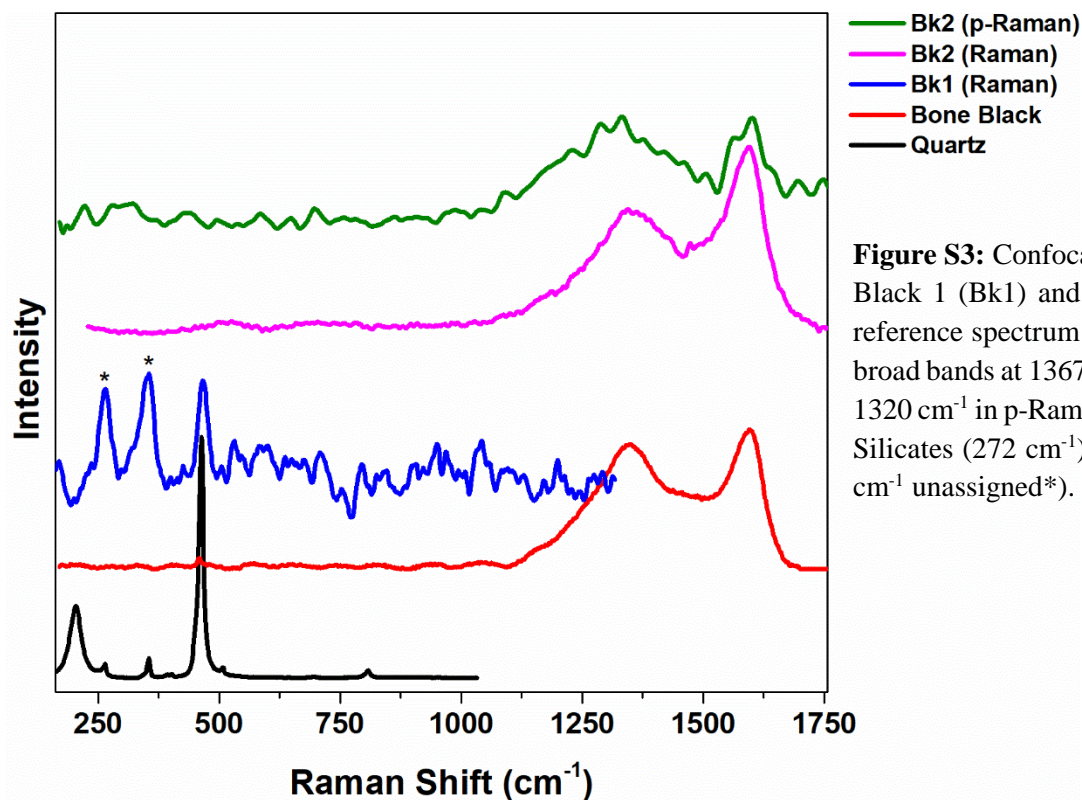

**Figure S3:** Confocal and p-Raman spectra of Black 1 (Bk1) and Black 2 (Bk2) alongside reference spectrum for Bone black (D and G broad bands at 1367 and 1590  $\text{cm}^{-1}$  - shifted to 1320  $\text{cm}^{-1}$  in p-Raman). Quartz (468  $\text{cm}^{-1}$ ) and Silicates (272  $\text{cm}^{-1}$ ) were also observed (355  $\text{cm}^{-1}$  unassigned\*).

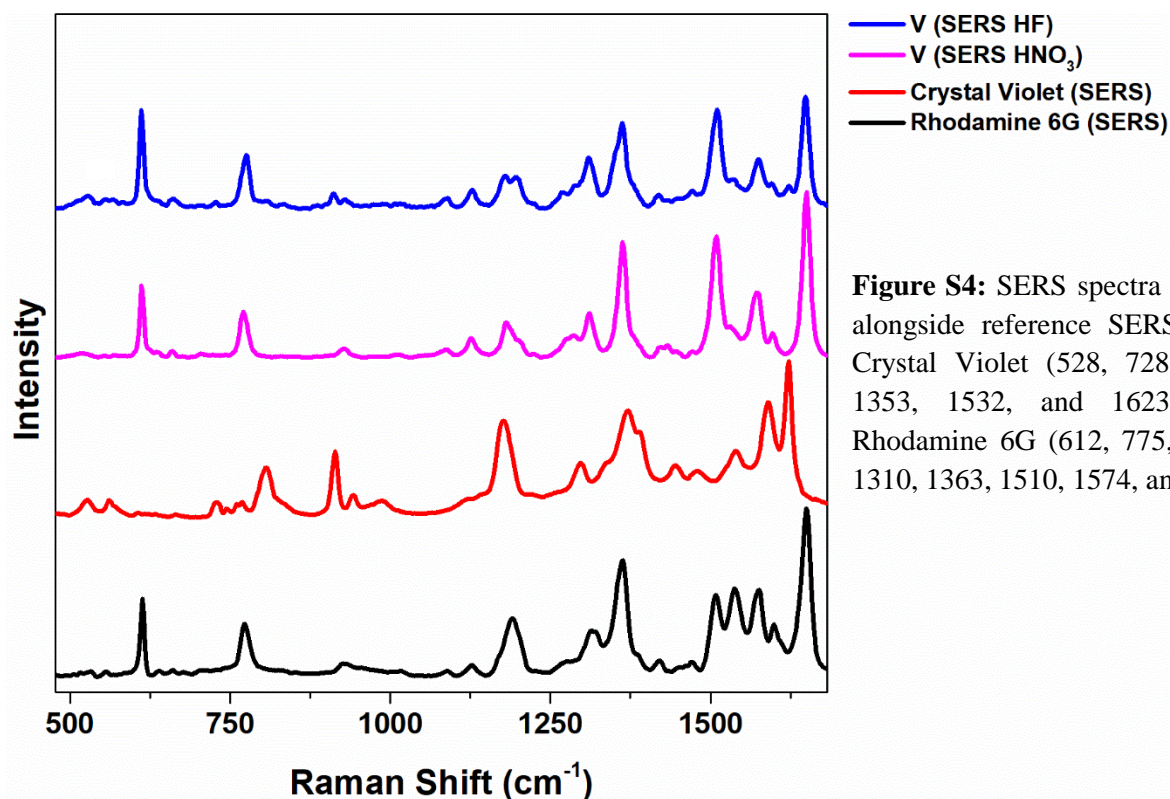

**Figure S4:** SERS spectra of Violet (V) alongside reference SERS spectra for Crystal Violet (528, 728, 912, 1180, 1353, 1532, and 1623  $\text{cm}^{-1}$ ) and Rhodamine 6G (612, 775, 1090, 1179, 1310, 1363, 1510, 1574, and 1679  $\text{cm}^{-1}$ ).

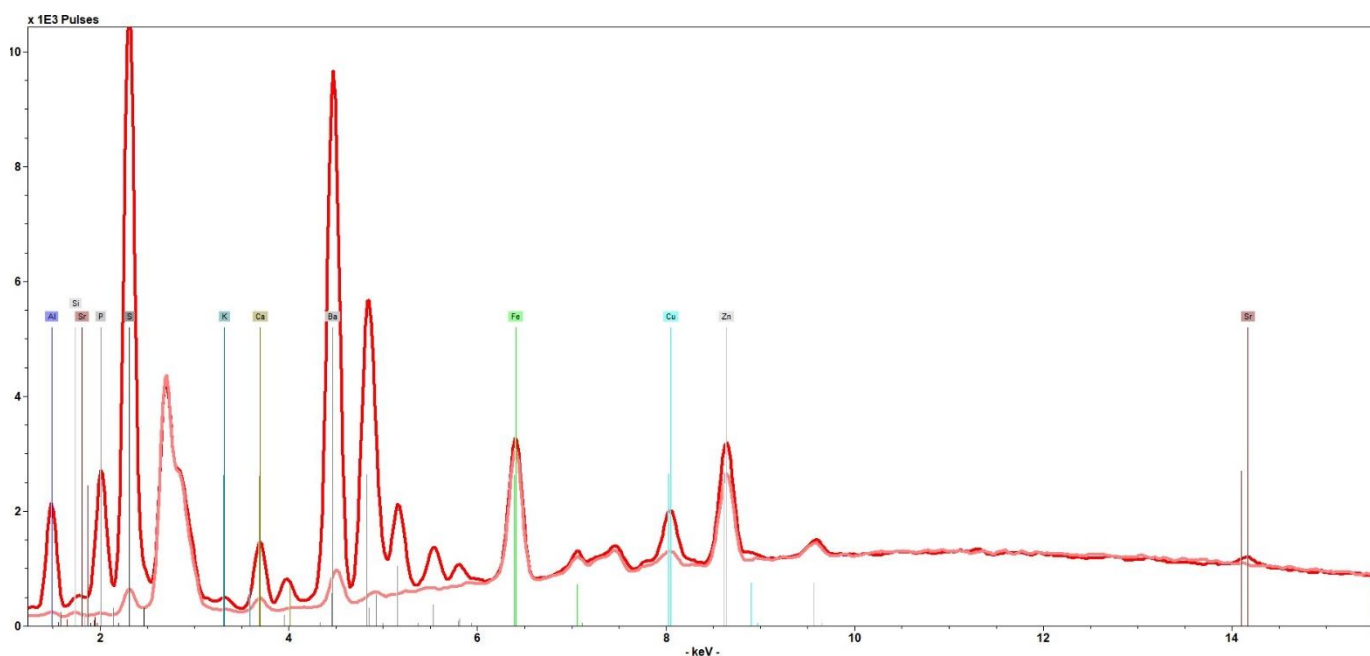

**Figure S5:** p-XRF spectrum for the (red) violet gouache V and (light red) paper support (plate P20). Elements present in the gouache: Al, Si, P, S, K, Ca, Fe, Cu, Zn, Sr and Ba.

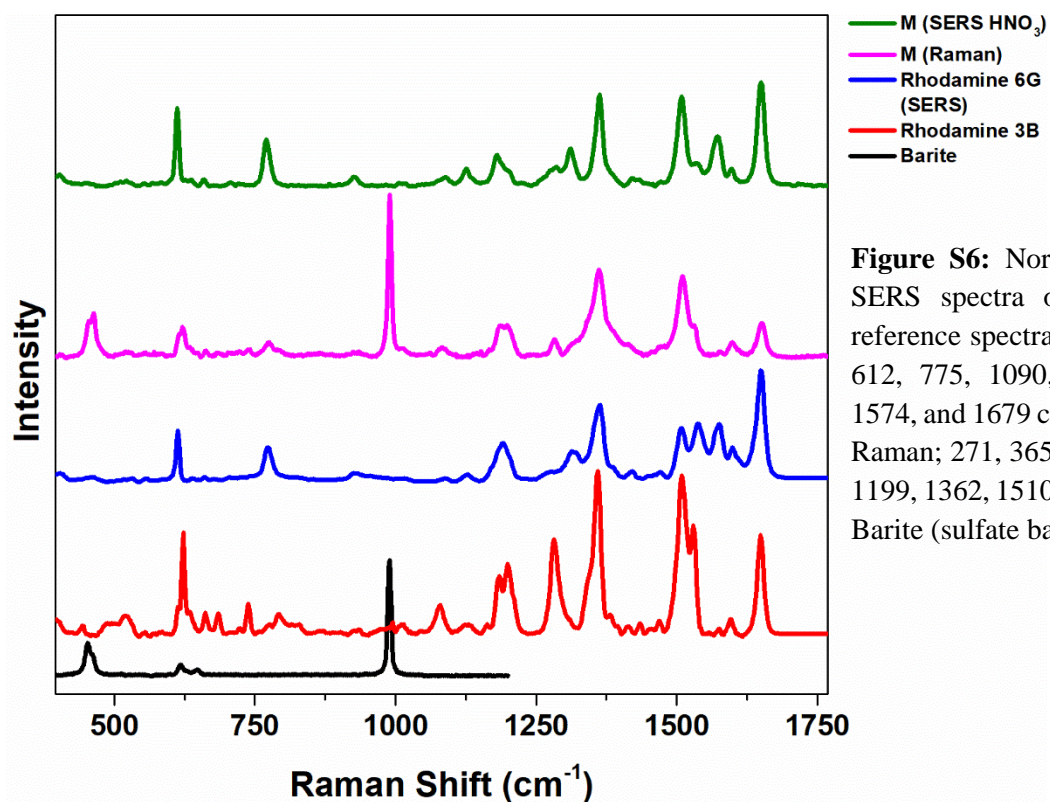

**Figure S6:** Normal (confocal) Raman and SERS spectra of Magenta (M) alongside reference spectra for Rhodamine 6G (SERS; 612, 775, 1090, 1179, 1310, 1363, 1510, 1574, and 1679 cm<sup>-1</sup>), Rhodamine 3B (normal Raman; 271, 365, 620, 633, 662, 1082, 1187, 1199, 1362, 1510, 1530, 1599, 1650 cm<sup>-1</sup>) and Barite (sulfate band at 988 cm<sup>-1</sup>).

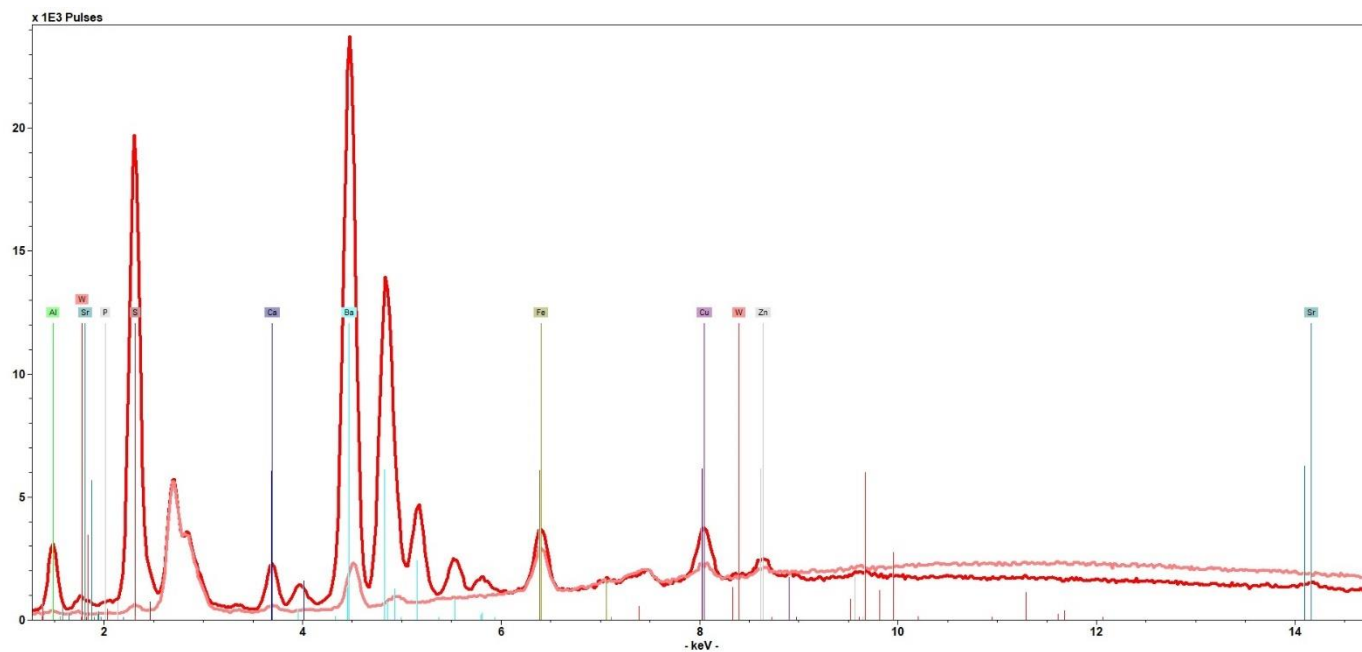

**Figure S7:** p-XRF spectrum for the (red) magenta gouache M and (light red) paper support (plate P6). Elements present: Al, P, S, Ca, Fe, Cu, Zn, Sr, Ba and W.

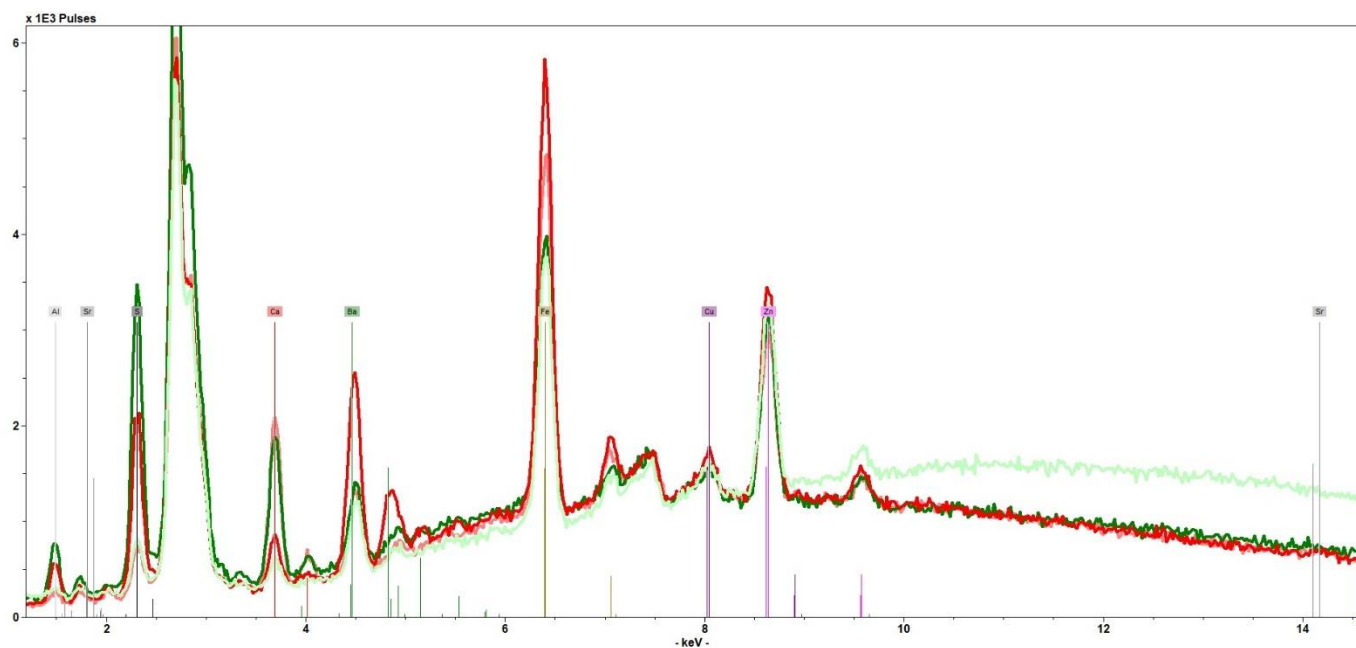

**Figure S8:** p-XRF spectrum for the pink gouaches: (red and light red) Pk1 and paper support (plate P16) and (green and light green) Pk2 (plate P20). Elements present in the gouaches: Al, S, Ca, Fe, Cu, Zn, Sr and Ba.

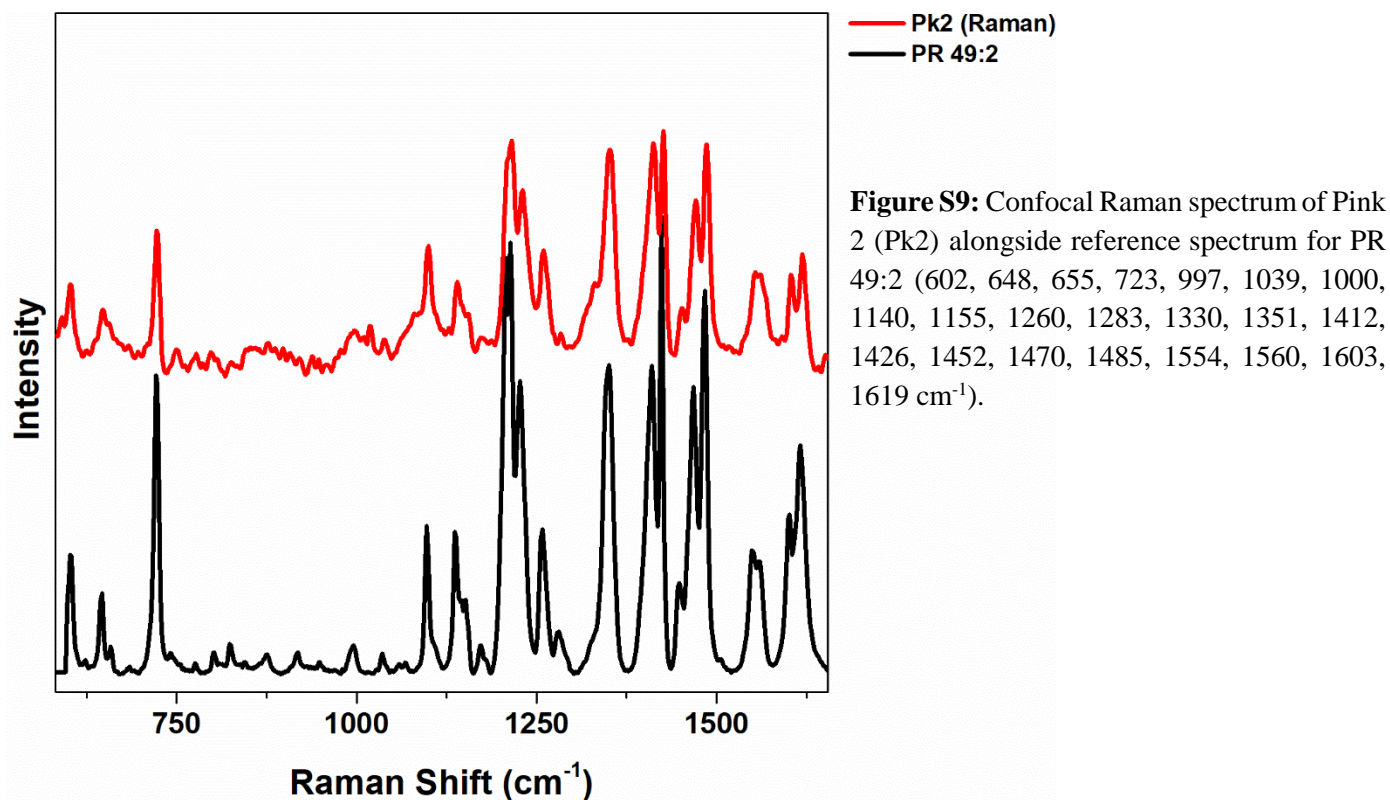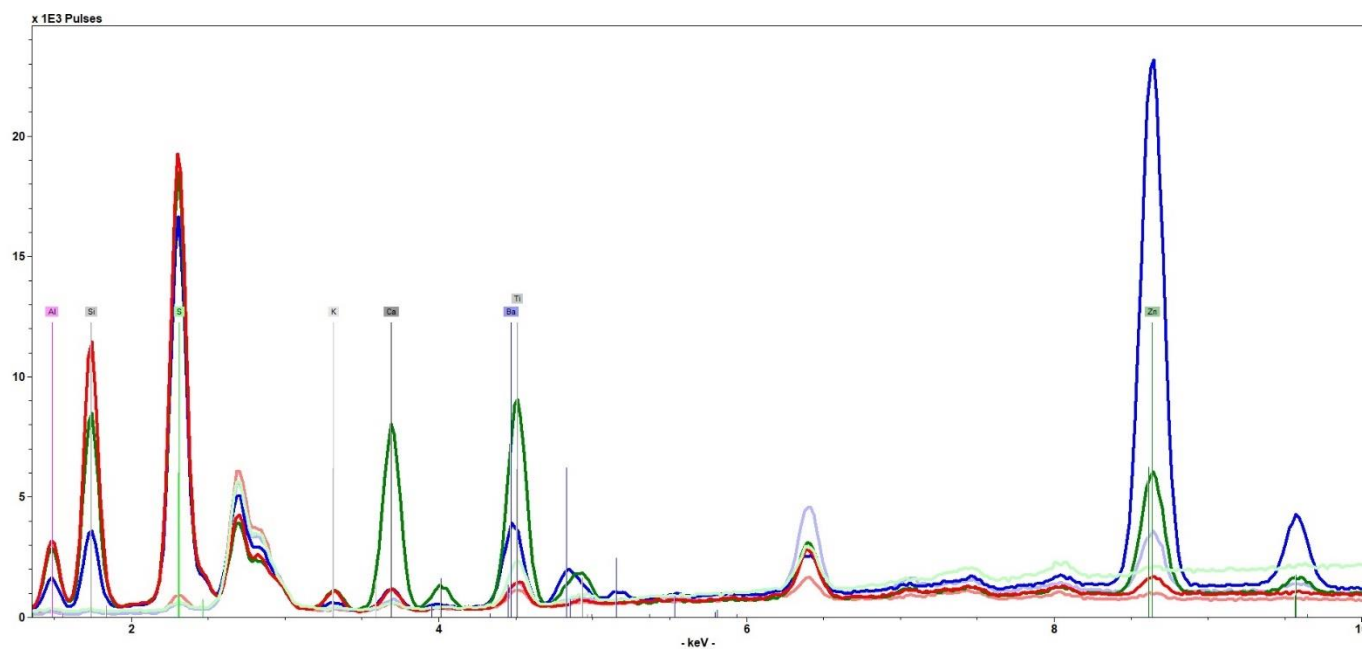

**Figure S10:** p-XRF spectrum for the blue gouaches: (red and light red) B1 and paper support (plate P1), (green and light green) B2 (plate P19), (blue and light blue) B3 and paper support (plate P6). Elements present in the gouaches: Al, Si, S, K, Ca, Ti, Zn and Ba.

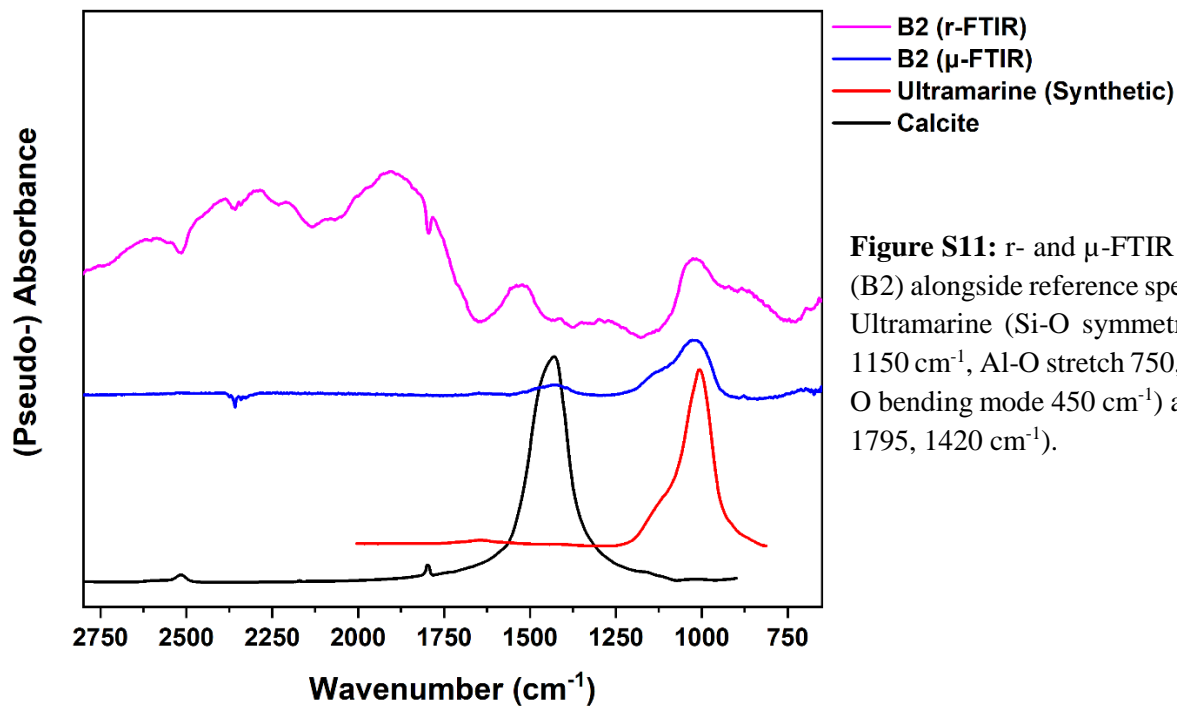

**Figure S11:** r- and  $\mu$ -FTIR spectra of Blue 2 (B2) alongside reference spectra for Synthetic Ultramarine (Si-O symmetric stretch (1010, 1150  $\text{cm}^{-1}$ , Al-O stretch 750, 650  $\text{cm}^{-1}$ , and Si-O bending mode 450  $\text{cm}^{-1}$ ) and Calcite (2514, 1795, 1420  $\text{cm}^{-1}$ ).

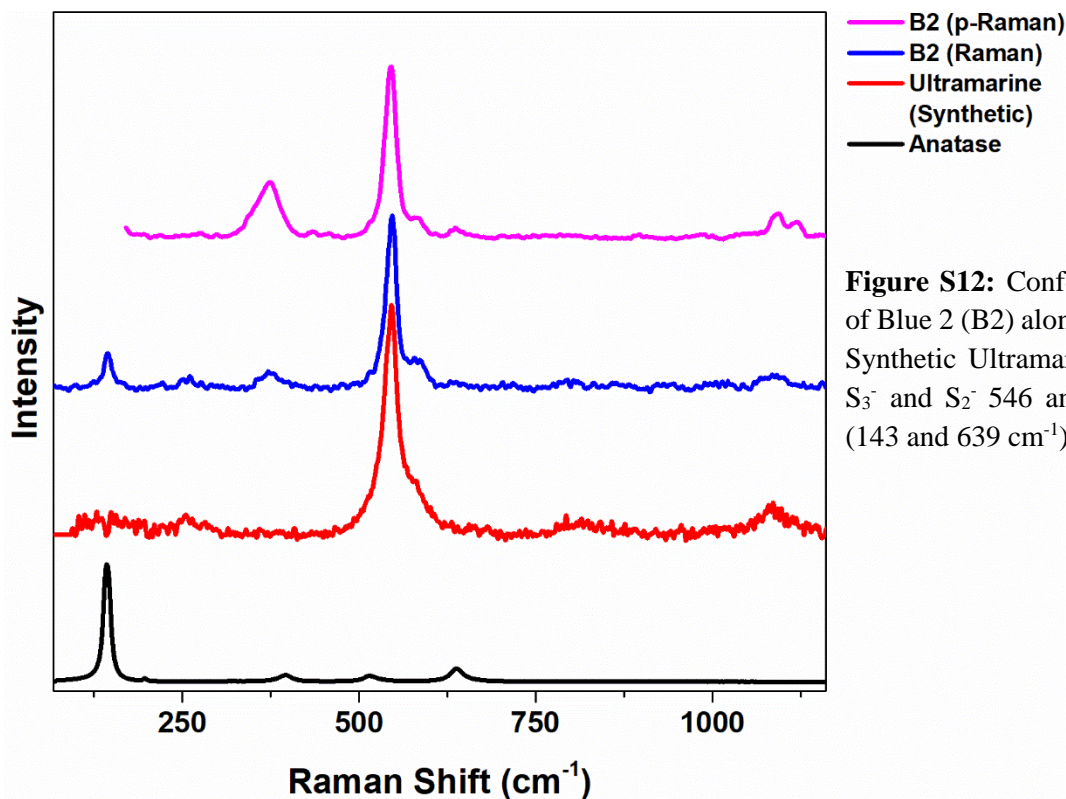

**Figure S12:** Confocal and p-Raman spectra of Blue 2 (B2) alongside reference spectra for Synthetic Ultramarine (sulfur radical anions  $\text{S}_3^-$  and  $\text{S}_2^-$  546 and 580  $\text{cm}^{-1}$ ) and Anatase (143 and 639  $\text{cm}^{-1}$ ).

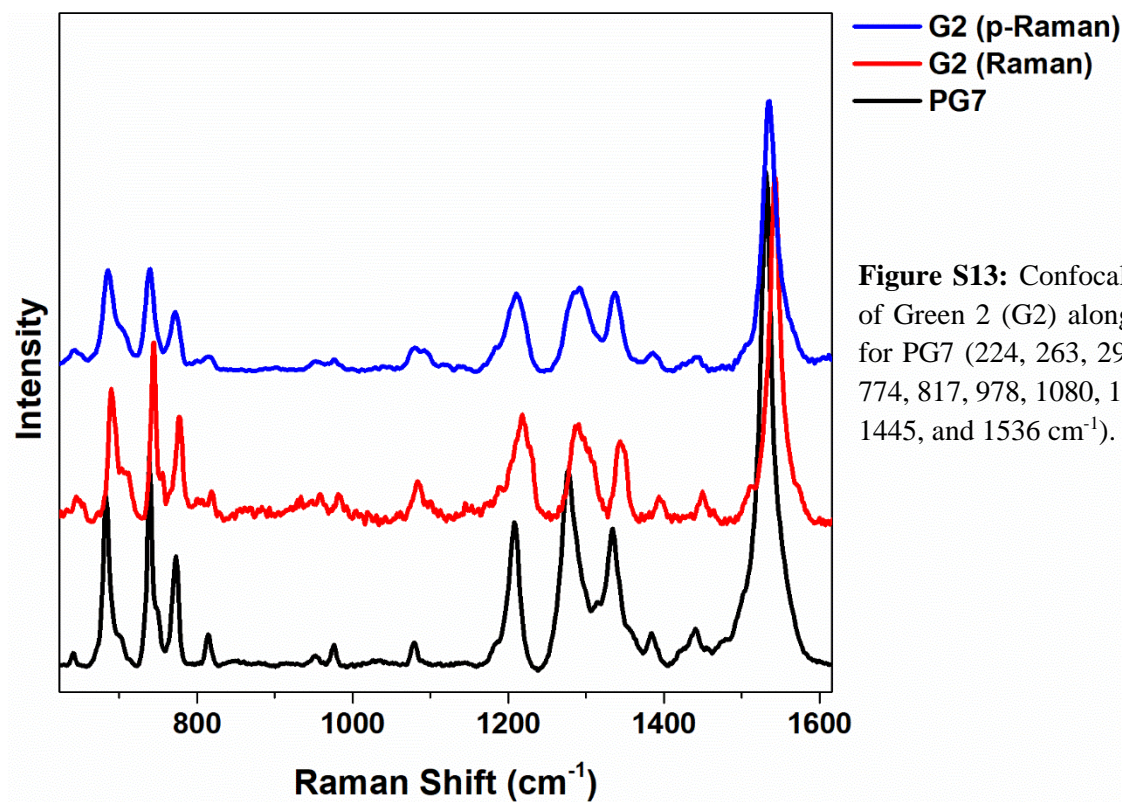

**Figure S13:** Confocal and p-Raman spectra of Green 2 (G2) alongside reference spectra for PG7 (224, 263, 291, 644, 682, 705, 739, 774, 817, 978, 1080, 1212, 1281, 1338, 1387, 1445, and 1536  $\text{cm}^{-1}$ ).

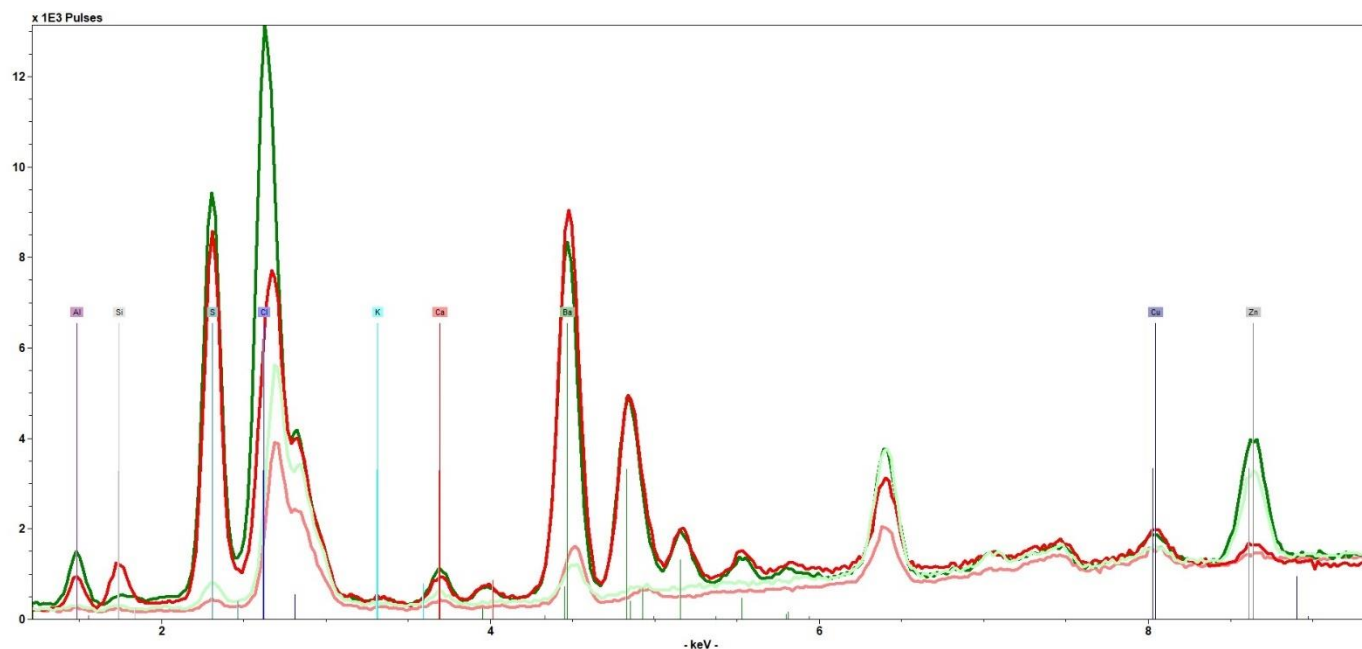

**Figure S14:** p-XRF spectrum for the green gouaches: (red and light red) G1 and paper support (plate P20), (green and light green) G3 (plate P6). Elements present in the gouaches: Al, Si, S, Cl, K, Ca, Cu, Zn and Ba.

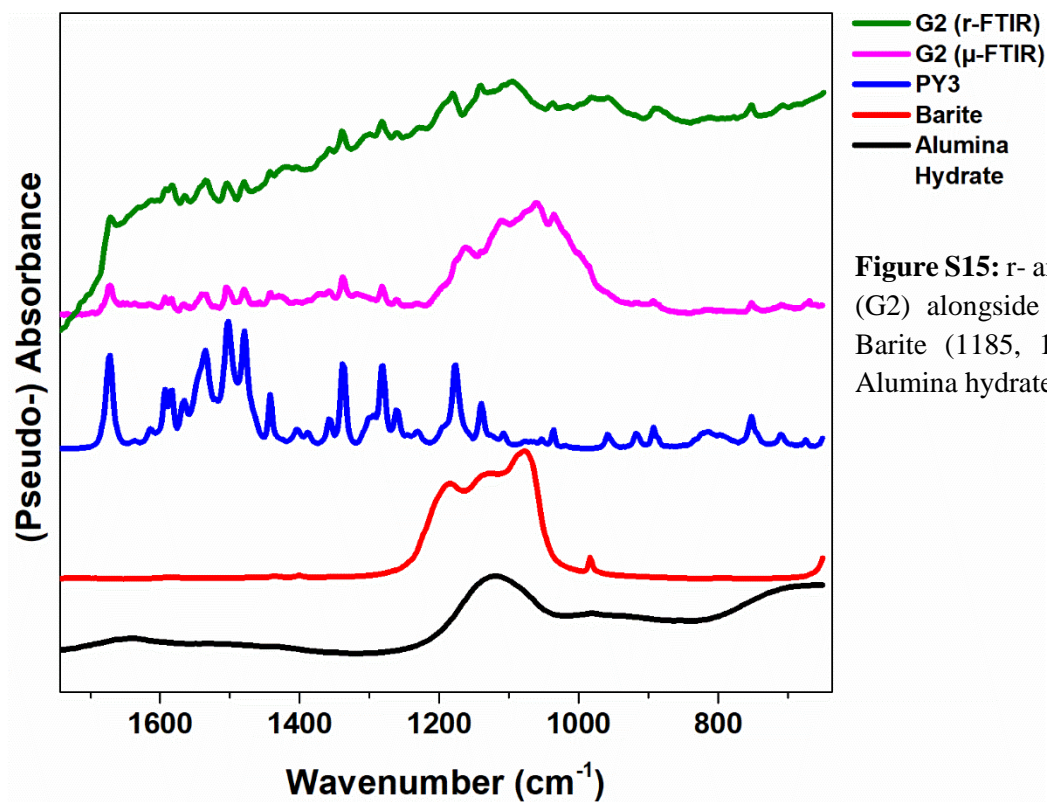

**Figure S15:** r- and  $\mu$ -FTIR spectra of Green 2 (G2) alongside reference spectra for PY3, Barite (1185, 1114, 1077, 984  $\text{cm}^{-1}$ ) and Alumina hydrate (1122, 982, 940  $\text{cm}^{-1}$ ).

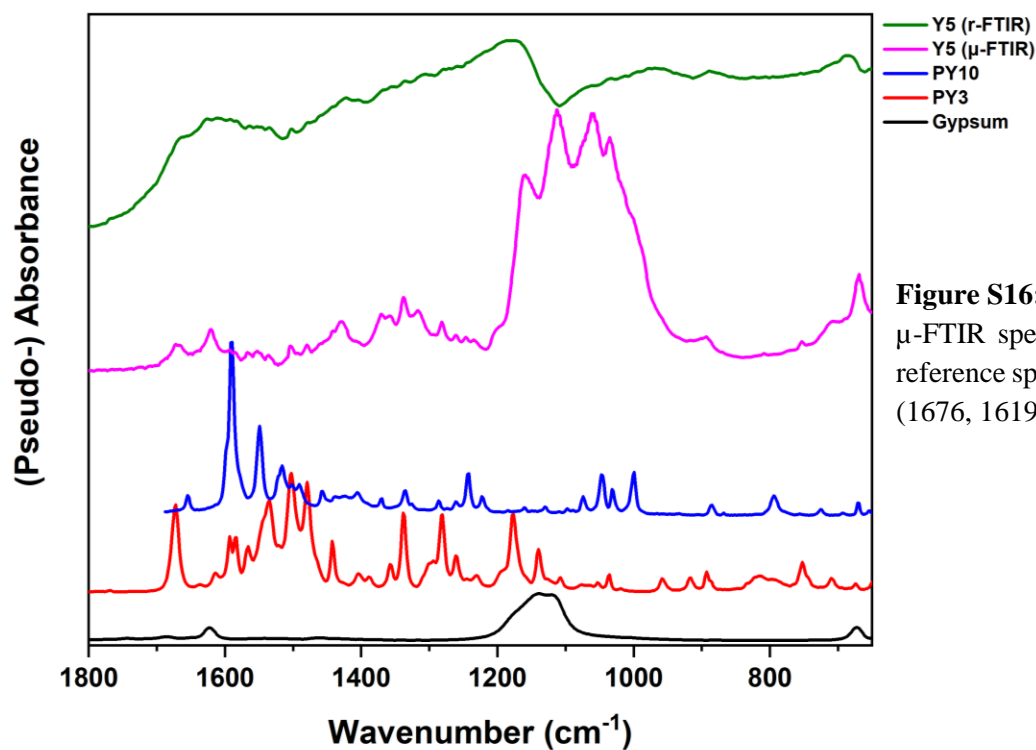

**Figure S16:** r- (with KK transformation) and  $\mu$ -FTIR spectra of Yellow 5 (Y5) alongside reference spectra for PY10, PY3 and Gypsum (1676, 1619, 1112, and 675  $\text{cm}^{-1}$ ).

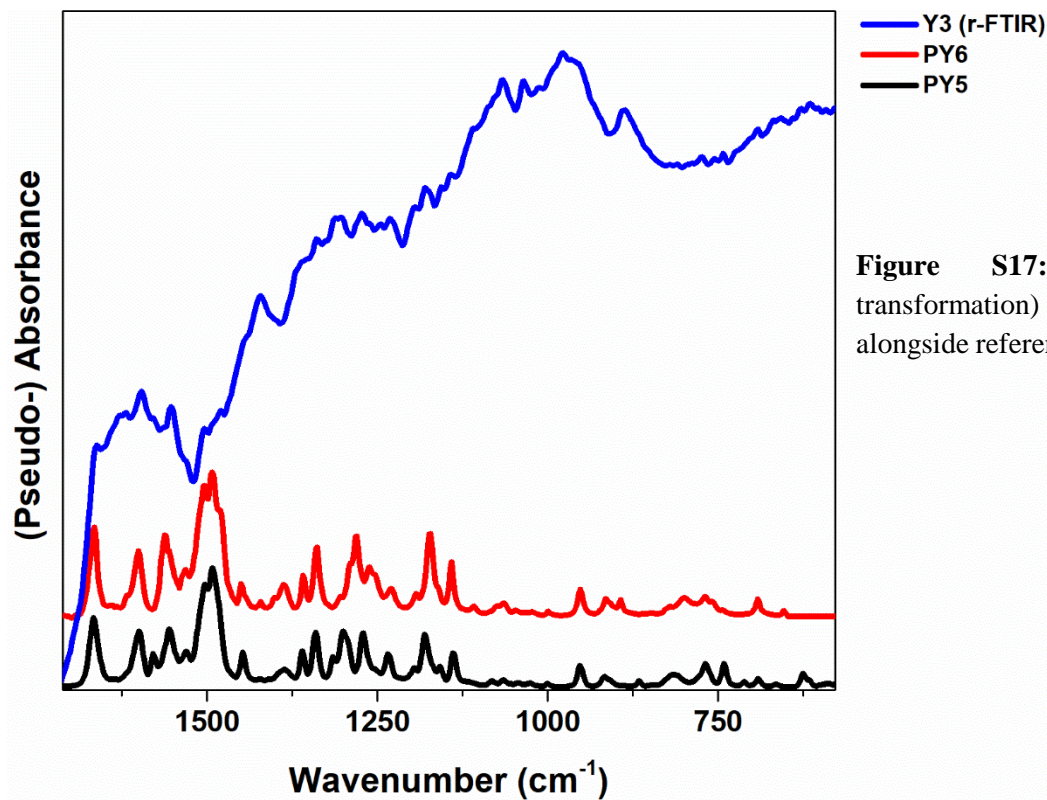

**Figure S17:** r-FTIR (with KK transformation) spectrum of Yellow 3 (Y3) alongside reference spectra for PY6 and PY5.

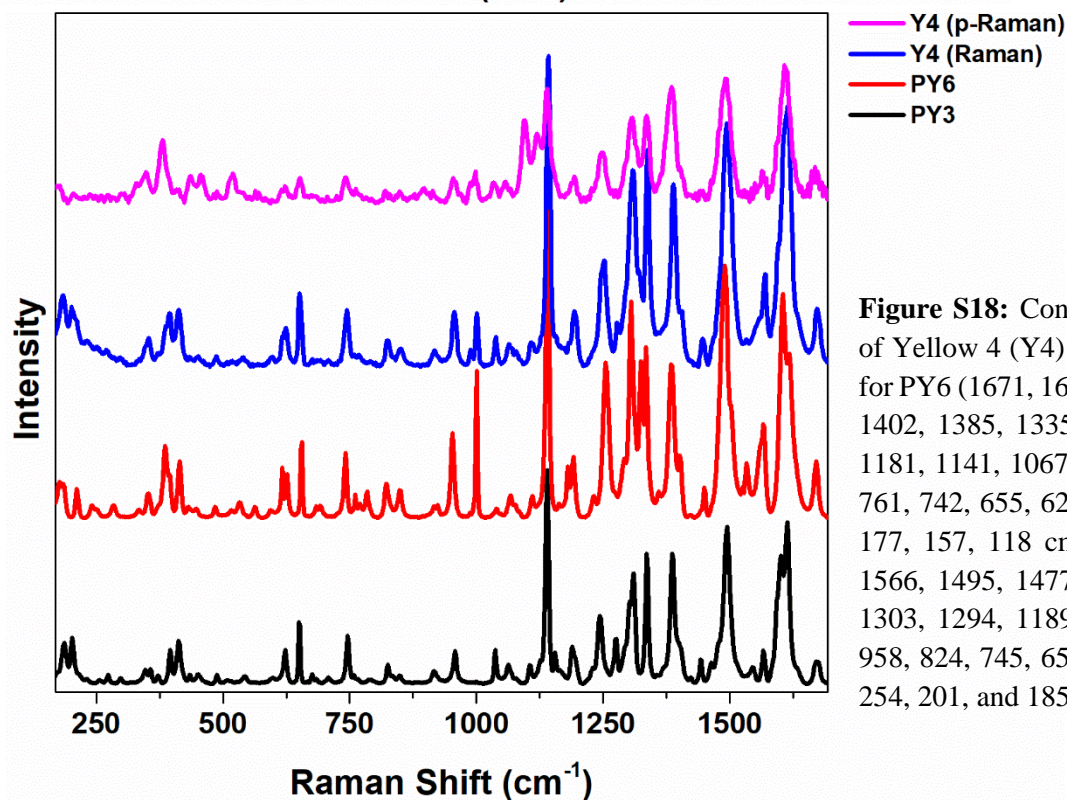

**Figure S18:** Confocal and p-Raman spectra of Yellow 4 (Y4) alongside reference spectra for PY6 (1671, 1605, 1576, 1533, 1490, 1451, 1402, 1385, 1335, 1325, 1306, 1255, 1192, 1181, 1141, 1067, 1000, 953, 849, 822, 784, 761, 742, 655, 626, 617, 414, 386, 352, 212, 177, 157, 118  $\text{cm}^{-1}$ ) and PY3 (1614, 1594, 1566, 1495, 1477, 1440, 1387, 1337, 1310, 1303, 1294, 1189, 1139, 1104, 1060, 1034, 958, 824, 745, 650, 622, 395, 356, 346, 270, 254, 201, and 185  $\text{cm}^{-1}$ ).

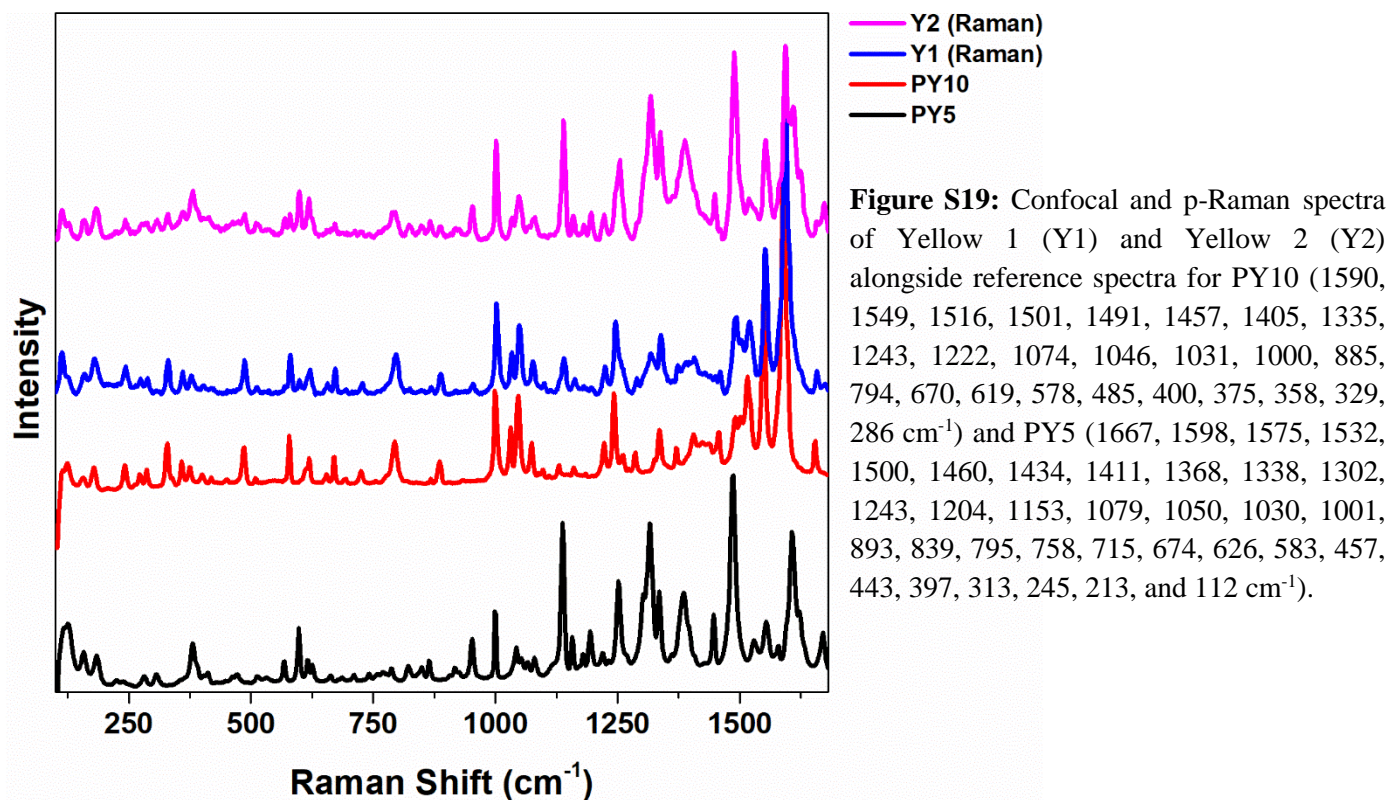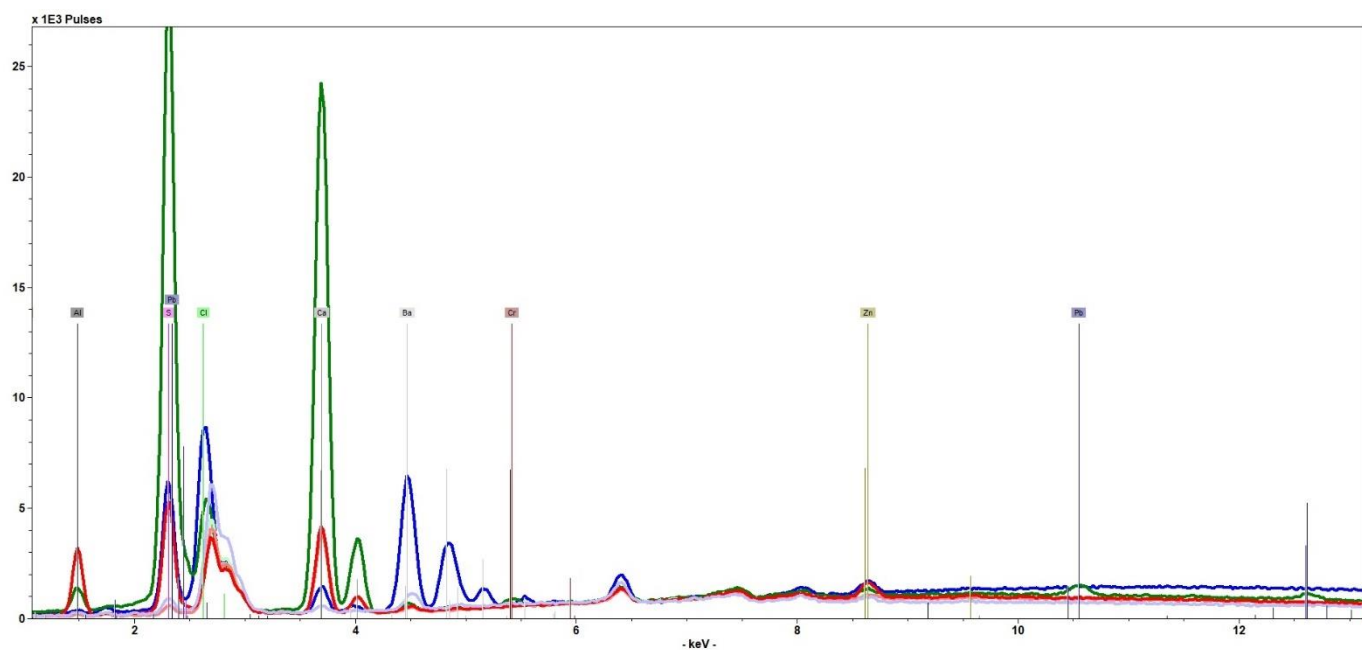

**Figure S20:** p-XRF spectrum for the yellow gouaches: (red and light red) Y1 and paper support (plate P10), (blue and light blue) Y4 (plate P1) and (green and light green) Y5 (plate P11). Elements present in the gouaches: Al, S, Cl, Ca, Cr, Zn, Ba and Pb.

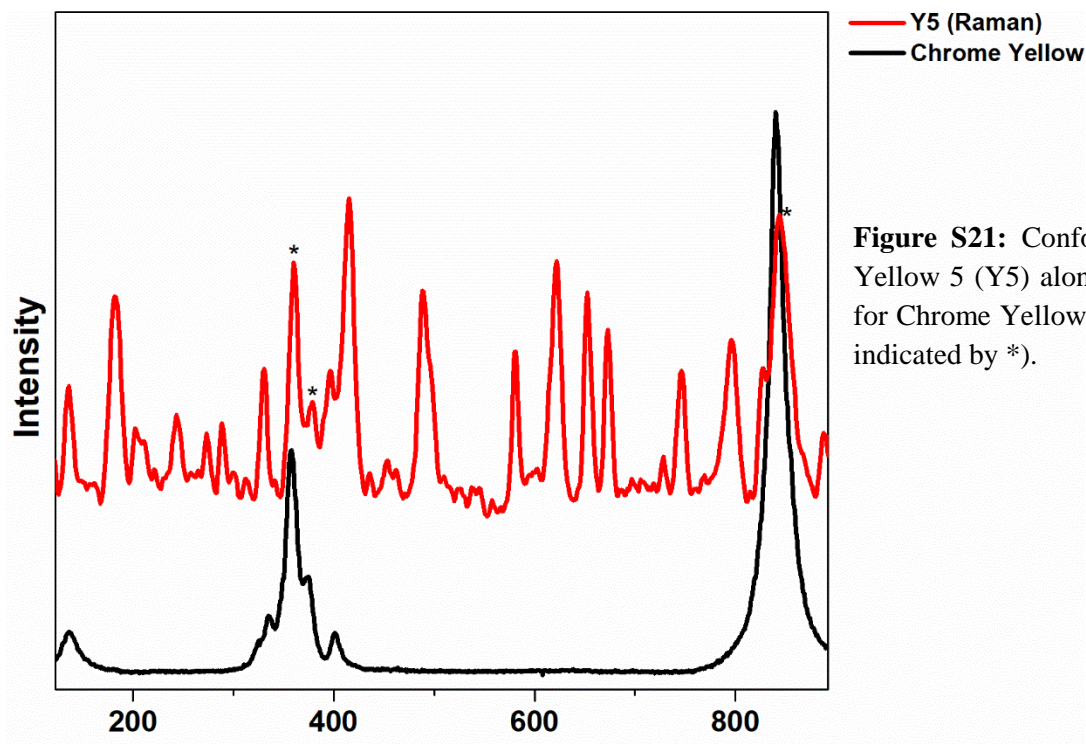

**Figure S21:** Confocal Raman spectrum of Yellow 5 (Y5) alongside reference spectrum for Chrome Yellow (360, 378, and 844  $\text{cm}^{-1}$ ; indicated by \*).

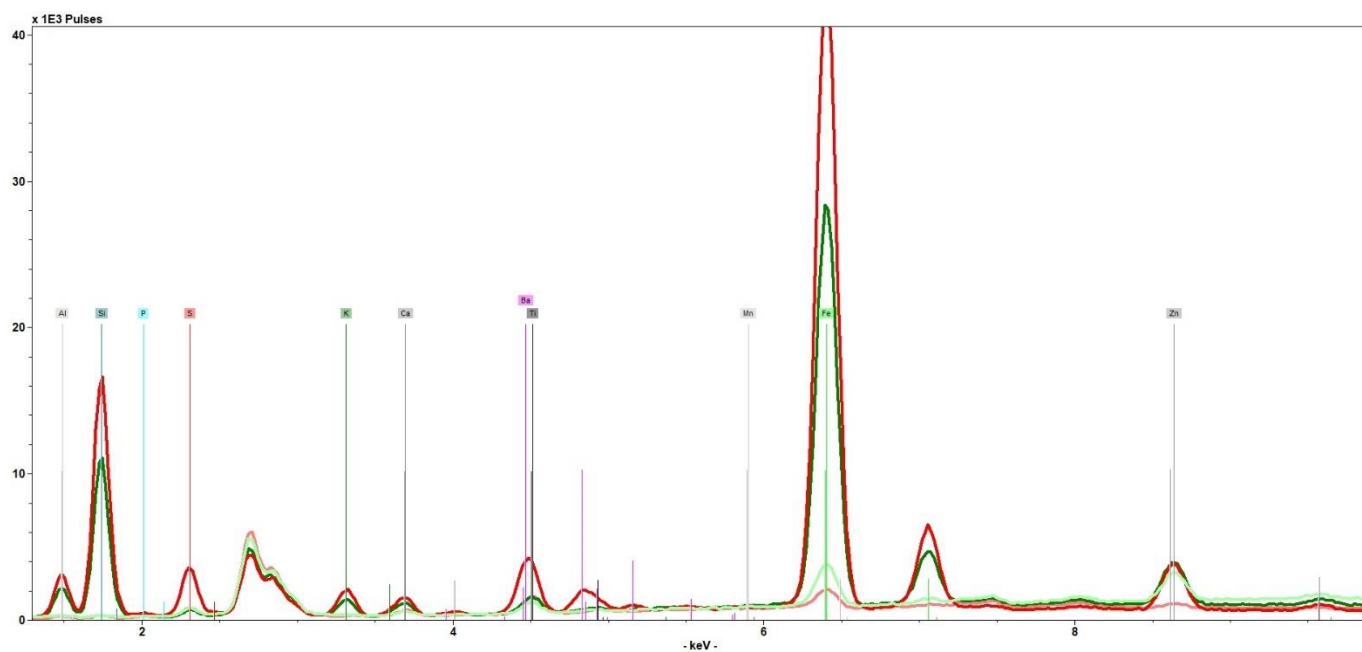

**Figure S22:** p-XRF spectrum for the orange gouaches: (red and light red) O4 and paper support (plate P2) and (green and light green) O5 (plate P20). Elements present in the gouaches: Al, Si, P, S, K, Ca, Ti, Mn, Fe, Zn and Ba.

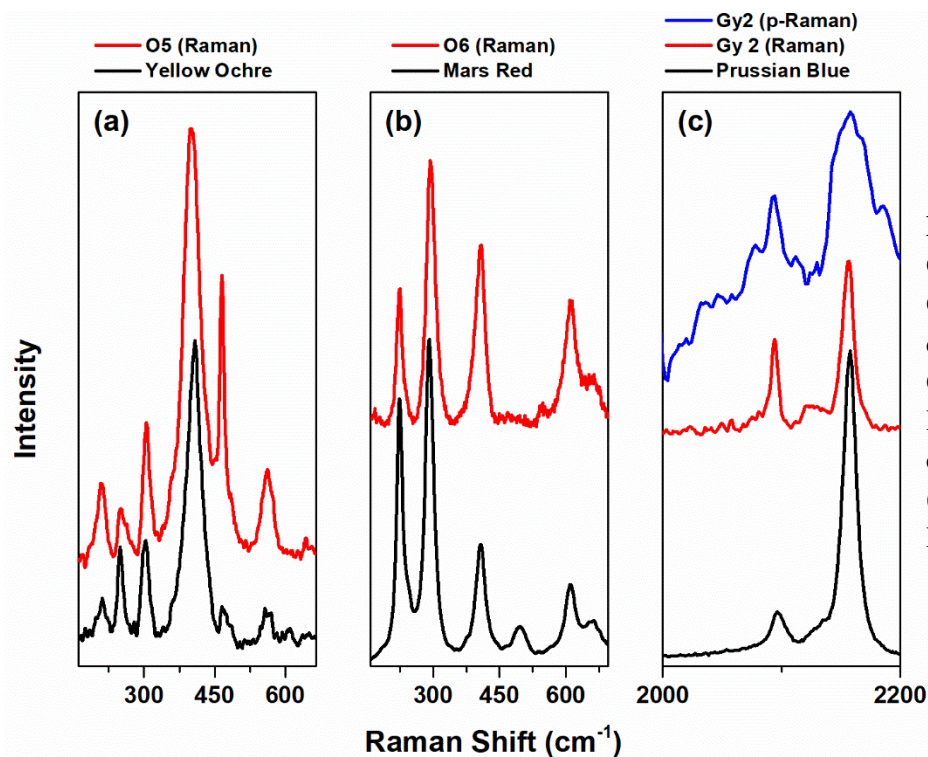

**Figure S23:** (a) Confocal Raman spectrum of Orange 5 (O5) alongside reference for Yellow Ochre (207, 248, 305, 357, 400, 464, and 561 cm<sup>-1</sup>); (b) confocal Raman spectrum of Orange 6 (O6) alongside reference for Mars Red (223, 293, 408, and 510 cm<sup>-1</sup>); (c) confocal and p-Raman spectrum of Gray 2 (Gy2) alongside reference spectrum of Prussian Blue (2092 and 2160 cm<sup>-1</sup>).

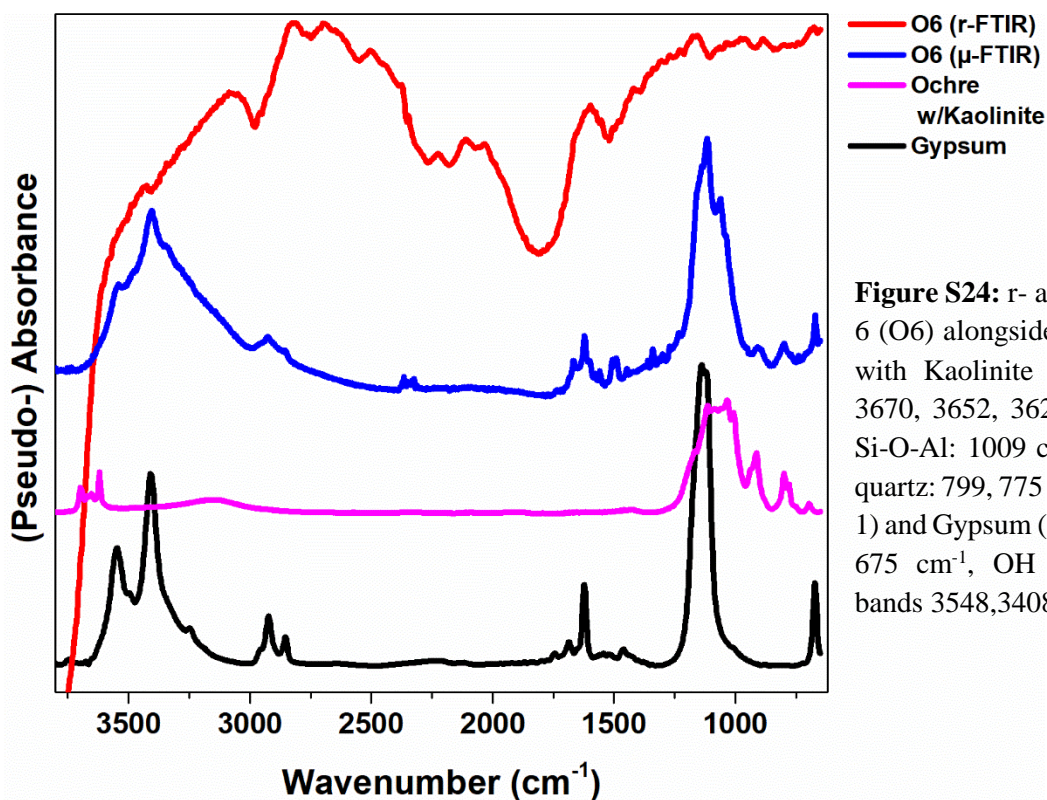

**Figure S24:** r- and μ-FTIR spectra of Orange 6 (O6) alongside reference spectra for Ochre with Kaolinite (outer hydroxyl ions 3696, 3670, 3652, 3620 cm<sup>-1</sup>, Si-O-Si: 1027 cm<sup>-1</sup>; Si-O-Al: 1009 cm<sup>-1</sup>; Al-O-H: 936, 914 cm<sup>-1</sup>, quartz: 799, 775 cm<sup>-1</sup>; haematite: 540, 469 cm<sup>-1</sup>) and Gypsum (sulfate vibration bands; 1112, 675 cm<sup>-1</sup>, OH stretching and deformation bands 3548, 3408, 1676, 1619 cm<sup>-1</sup>).

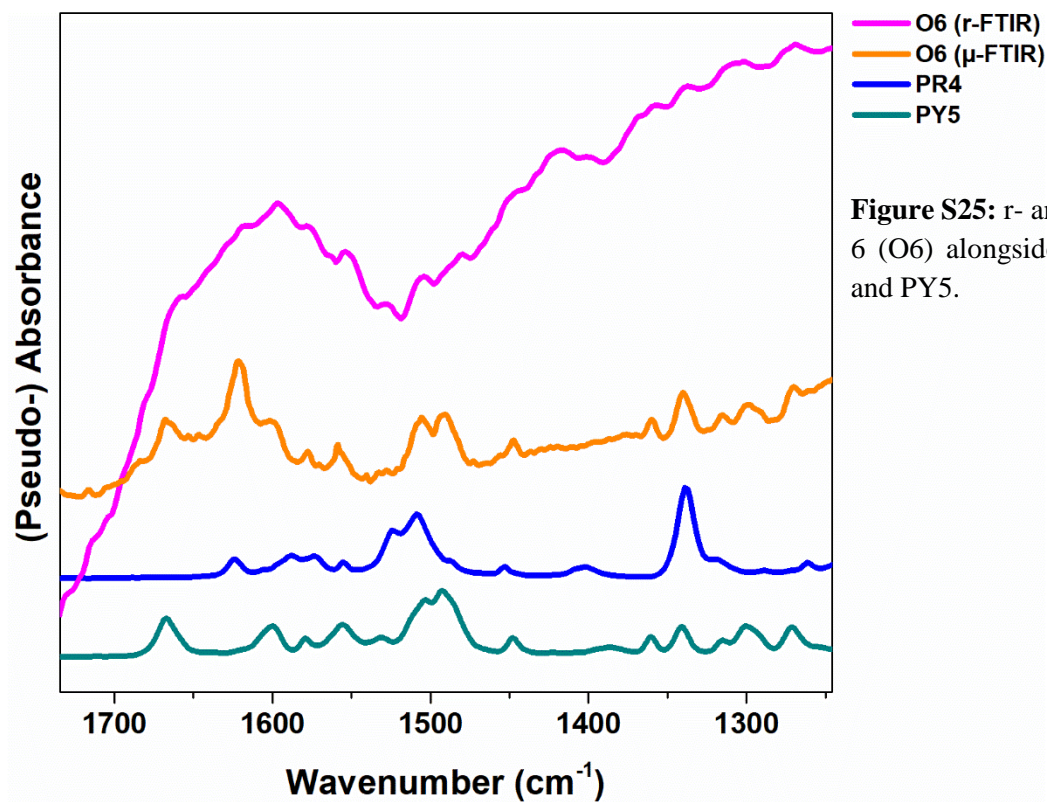

**Figure S25:** r- and  $\mu$ -FTIR spectra of Orange 6 (O6) alongside reference spectra for PR4 and PY5.

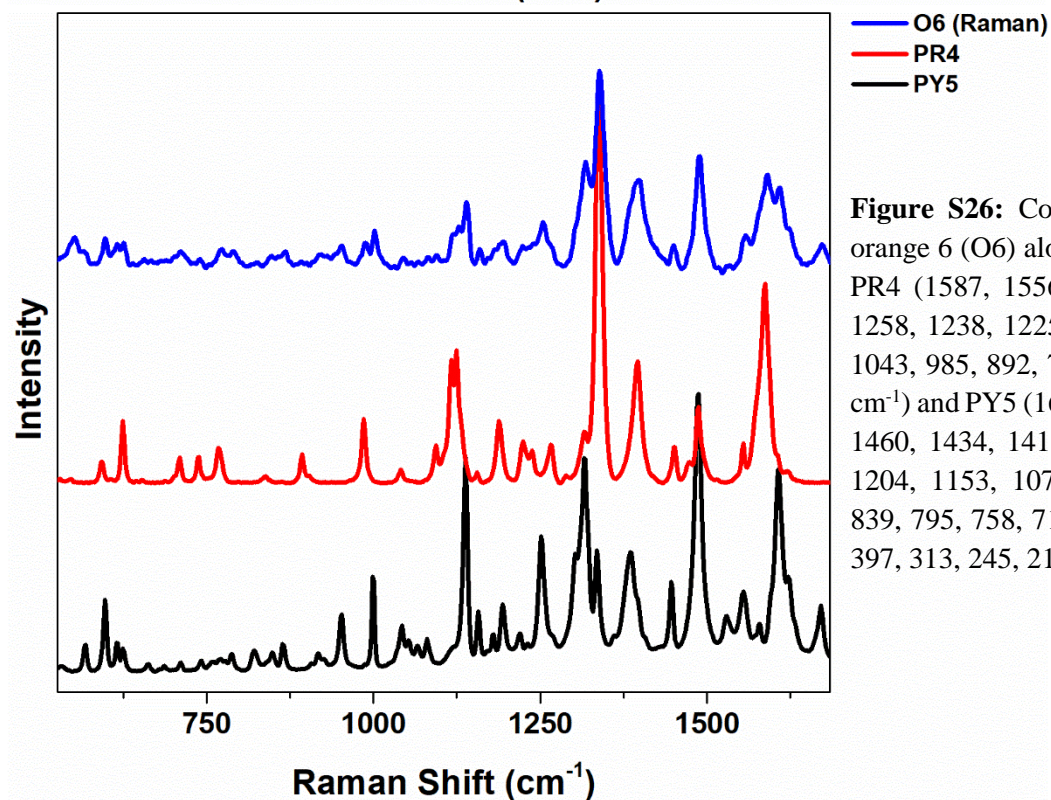

**Figure S26:** Confocal Raman spectrum of orange 6 (O6) alongside reference spectra for PR4 (1587, 1556, 1485, 1450, 1395, 1337, 1258, 1238, 1225, 1189, 1124, 1117, 1092, 1043, 985, 892, 767, 738, 709, 624, and 593  $\text{cm}^{-1}$ ) and PY5 (1667, 1598, 1575, 1532, 1500, 1460, 1434, 1411, 1368, 1338, 1302, 1243, 1204, 1153, 1079, 1050, 1030, 1001, 893, 839, 795, 758, 715, 674, 626, 583, 457, 443, 397, 313, 245, 213, and 112  $\text{cm}^{-1}$ ).

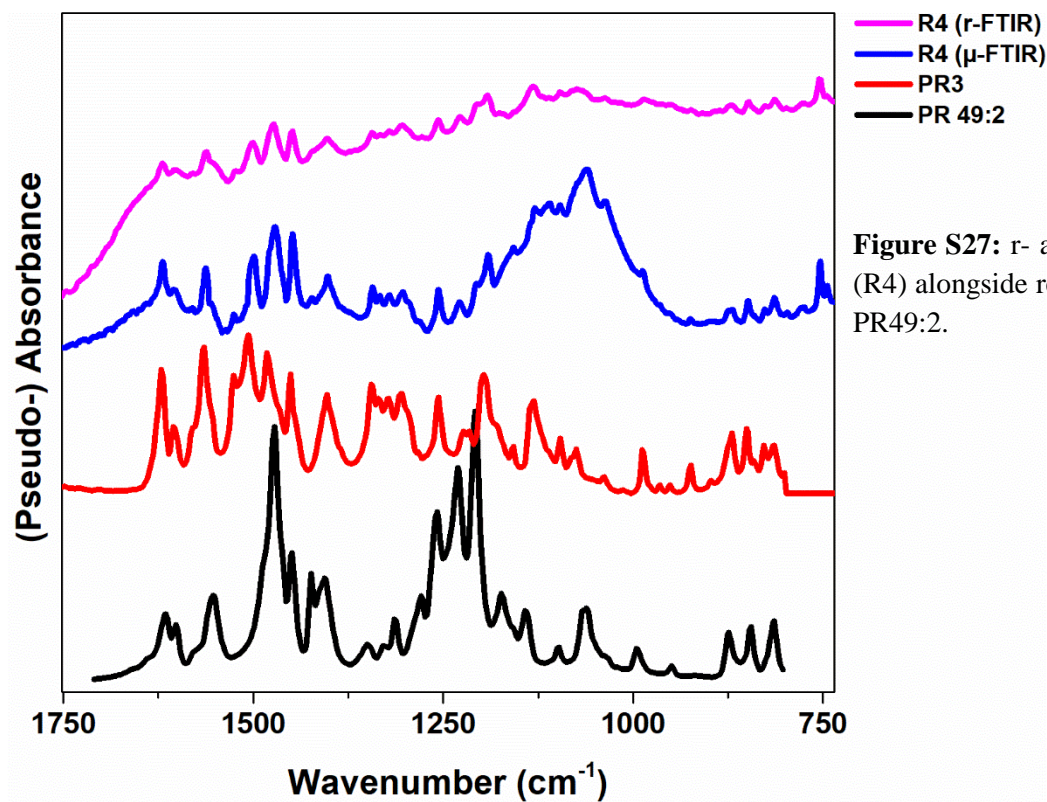

**Figure S27:** r- and  $\mu$ -FTIR spectra of Red 4 (R4) alongside reference spectra for PR3 and PR49:2.

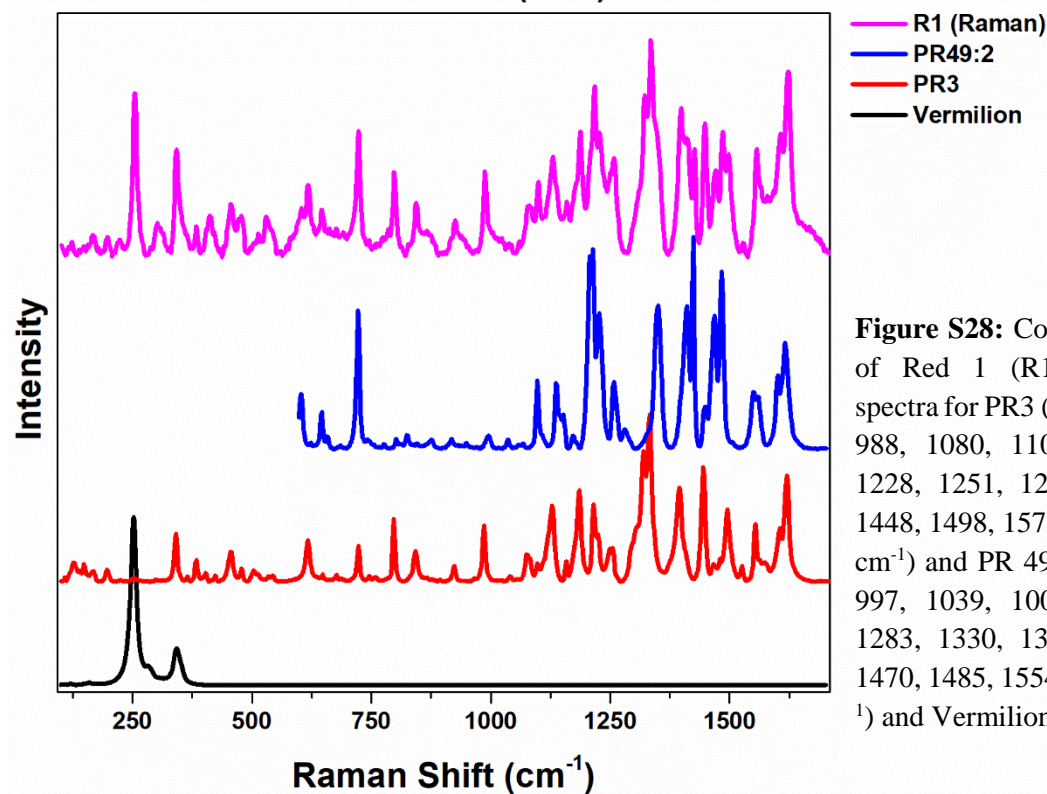

**Figure S28:** Confocal Raman spectrum of Red 1 (R1) alongside reference spectra for PR3 (617, 722, 798, 843, 925, 988, 1080, 1100, 1160, 1187, 1217, 1228, 1251, 1258, 1322, 1335, 1398, 1448, 1498, 1572, 1557, 1607, and 1623  $\text{cm}^{-1}$ ) and PR 49:2 (602, 648, 655, 723, 997, 1039, 1000, 1140, 1155, 1260, 1283, 1330, 1351, 1412, 1426, 1452, 1470, 1485, 1554, 1560, 1603, 1619  $\text{cm}^{-1}$ ) and Vermilion (255 and 342  $\text{cm}^{-1}$ ).

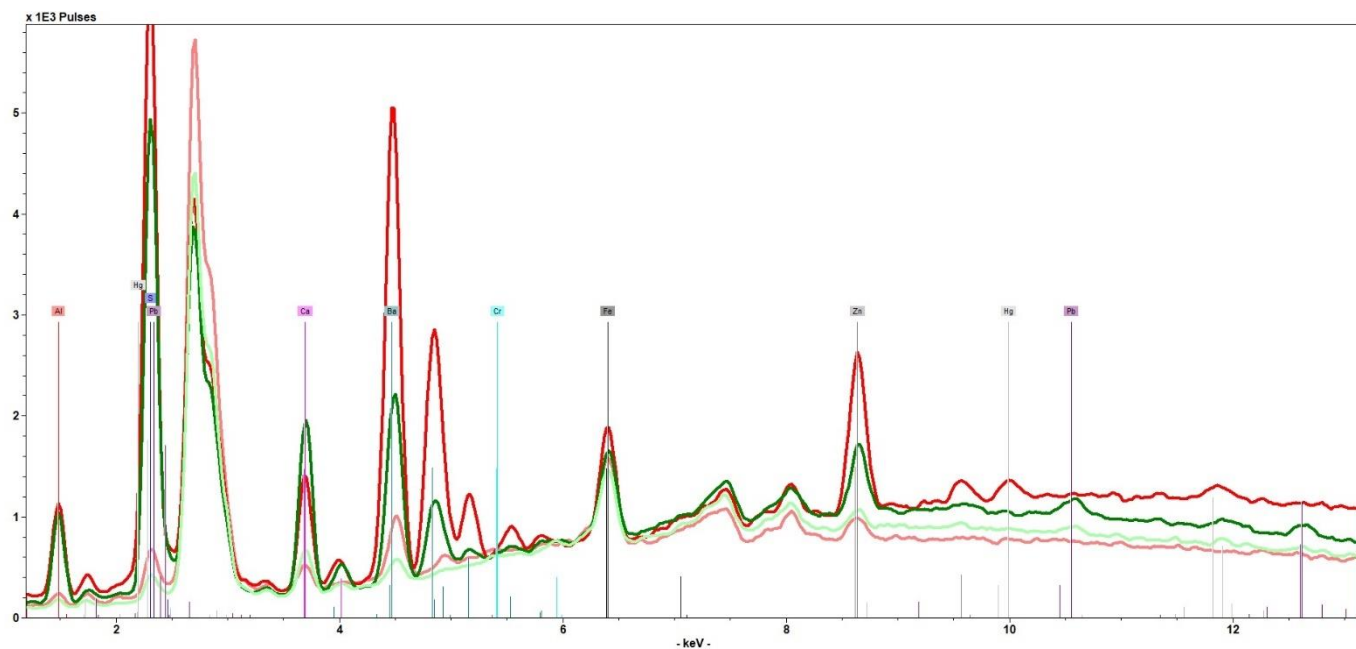

**Figure S29:** p-XRF spectrum for the red gouaches: (red and light red) R1 and paper support (plate P1) and (green and light green) R2 (plate P4). Elements present in the gouaches: Al, S, Ca, Cr, Zn, Ba, Hg and Pb.

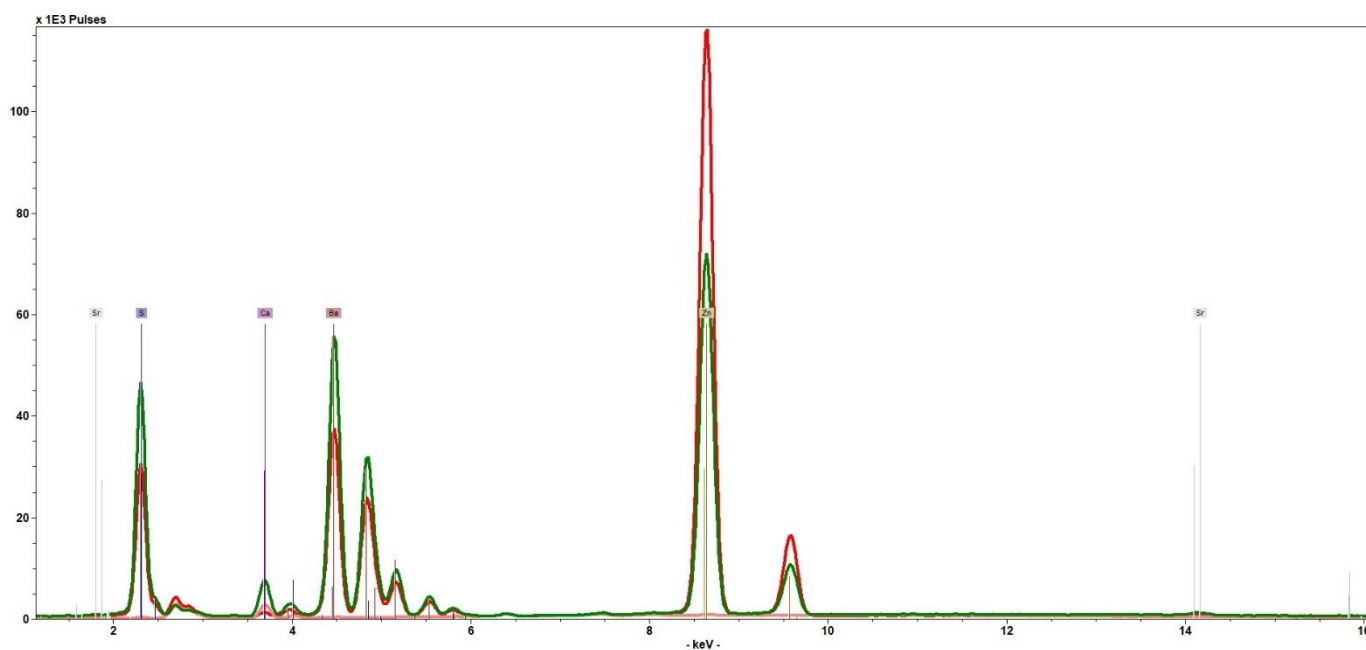

**Figure S30:** p-XRF spectrum for the white gouaches: (red and light red) W1 and paper support (plate P12) and (green and light green) W2 (plate P17). Elements present in the gouaches: S, Ca, Zn, Sr, Ba.

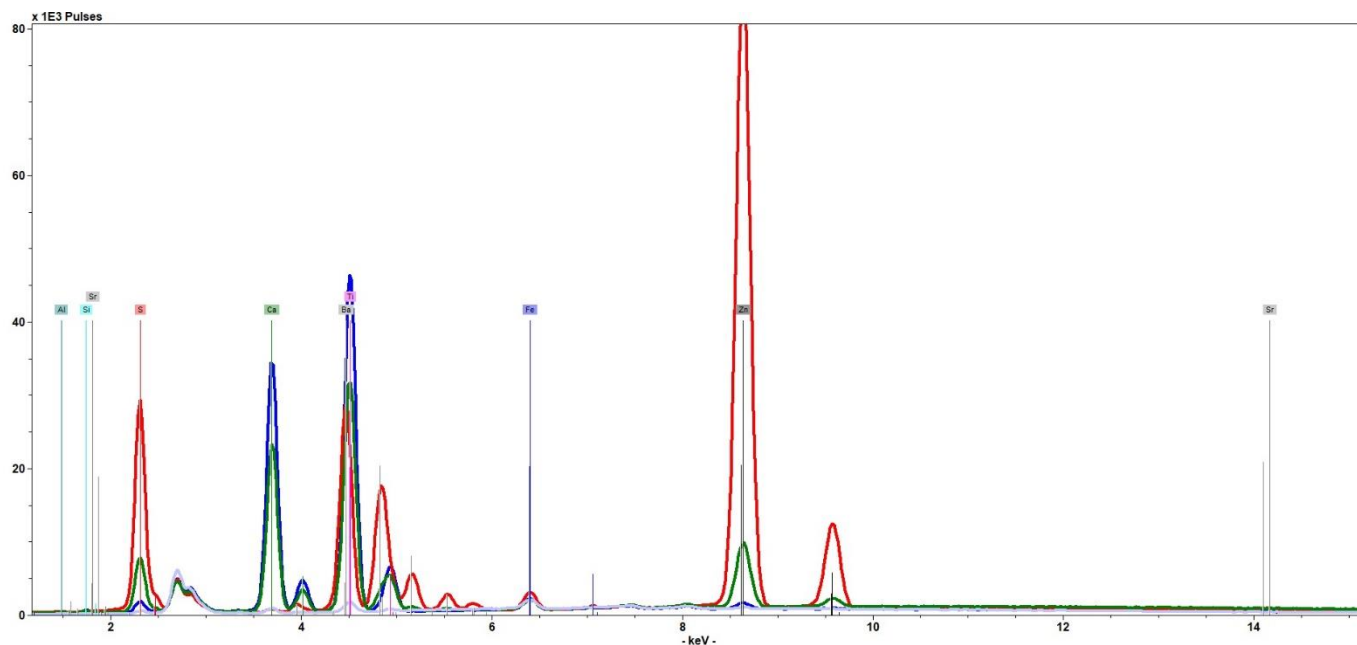

**Figure S31:** p-XRF spectrum for the gray gouaches: (red) Gy1 (plate P18), (green) Gy2 (plate P7) and (blue and light blue) Gy3 and paper support (plate P9). Elements present in the gouaches: Al, Si, S, Ca, Ti, Fe, Zn, Sr, Ba.

**Synthetic procedure for obtaining silver nanoparticles (AgNP) via the Lee-Miesel method, in addition to acid-pretreatment considerations for SERS analysis.**

AgNPs for SERS measurements were synthesized using the Lee-Miesel method. Two mL of a boiling 1% w/w solution sodium citrate were added to a 100 mL boiling solution of  $1 \times 10^{-3}$  M  $\text{AgNO}_3$  under agitation and left to simmer under reflux for approximately an hour. Colloids were concentrated 5 times over by centrifugation. SERS spectra were obtained before and after sample acid-based treatments that hydrolyze the pigments or dye into the colloid solution and, as a result, in greater contact with silver nanoparticles. Spectra were obtained of the same sample successively following each treatment. The first spectra were obtained by dropping 2  $\mu\text{L}$  of AgNPs onto the sample followed by 0.8  $\mu\text{L}$  of  $\text{KNO}_3$  to induce aggregation of the AgNPs. Second, after the colloidal solution was allowed to evaporate, 1  $\mu\text{L}$  of 1%  $\text{HNO}_3$  was dropped directly onto the sample before adding 2  $\mu\text{L}$  of AgNPs— here  $\text{HNO}_3$  to act as an aggregating agent. Third, after the solution was allowed to evaporate again, the sample was exposed to HF vapor. After 10 min of exposure, 2  $\mu\text{L}$  of AgNPs followed by 0.8  $\mu\text{L}$  of  $\text{KNO}_3$  were added for the final SERS spectra.
